# Supplementary material for: Blood DNA methylation sites predict death risk in a longitudinal study of 12, 300 individuals
Source: publisher site journal article supplement (doi:10.18632/aging.103408), 2020-07-22
Supplement: Supplementary file [file aging-v12i14-103408-supplementary-material-SD2.pdf]

## SUPPLEMENTARY FIGURES

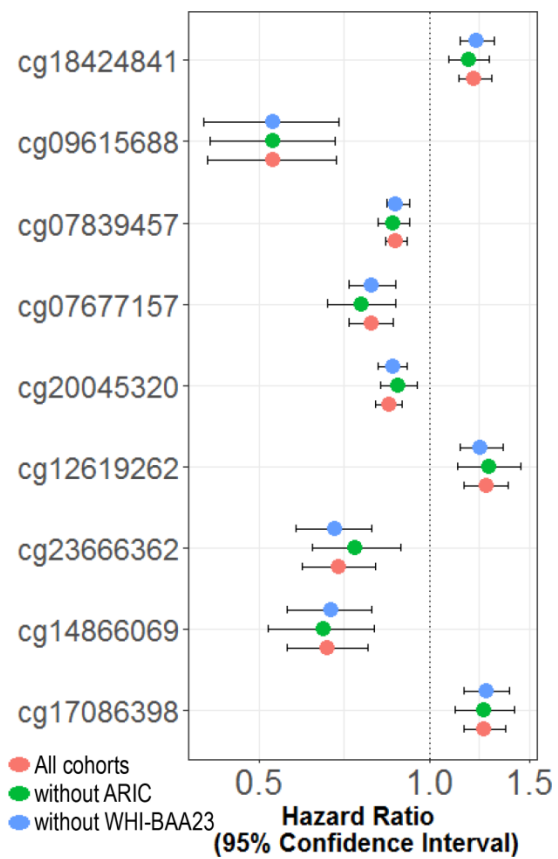

Supplementary Figure 1. Sensitivity analysis comparing hazard ratios of the fully-adjusted meta-analysis, including all cohorts, all excluding ARIC, or all excluding WHI-BAA23.

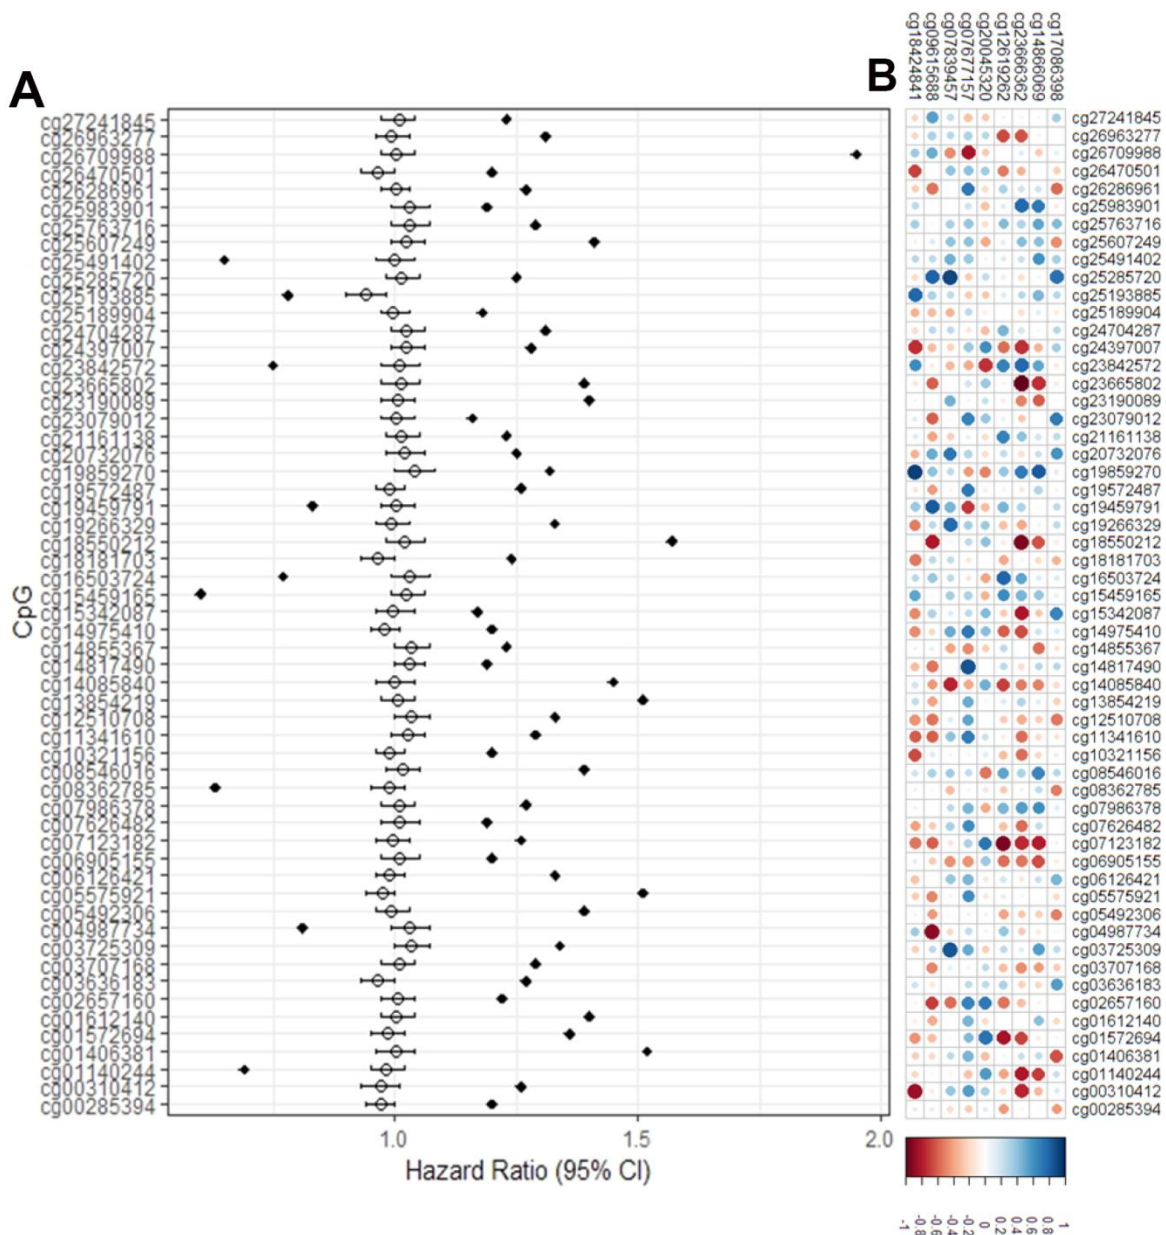

**Supplementary Figure 2.** (A) All-cause mortality association of 57 out of 58 CpGs identified with mortality in Zhang et al. (black dots) and all-cause mortality association of the same CpGs in the pooled meta-analysis (white dots with 95% confidence intervals). (B) Association of methylation levels of 57 out of 58 CpGs identified with mortality in Zhang et al. and our FDR-significant CpGs in all cohorts.

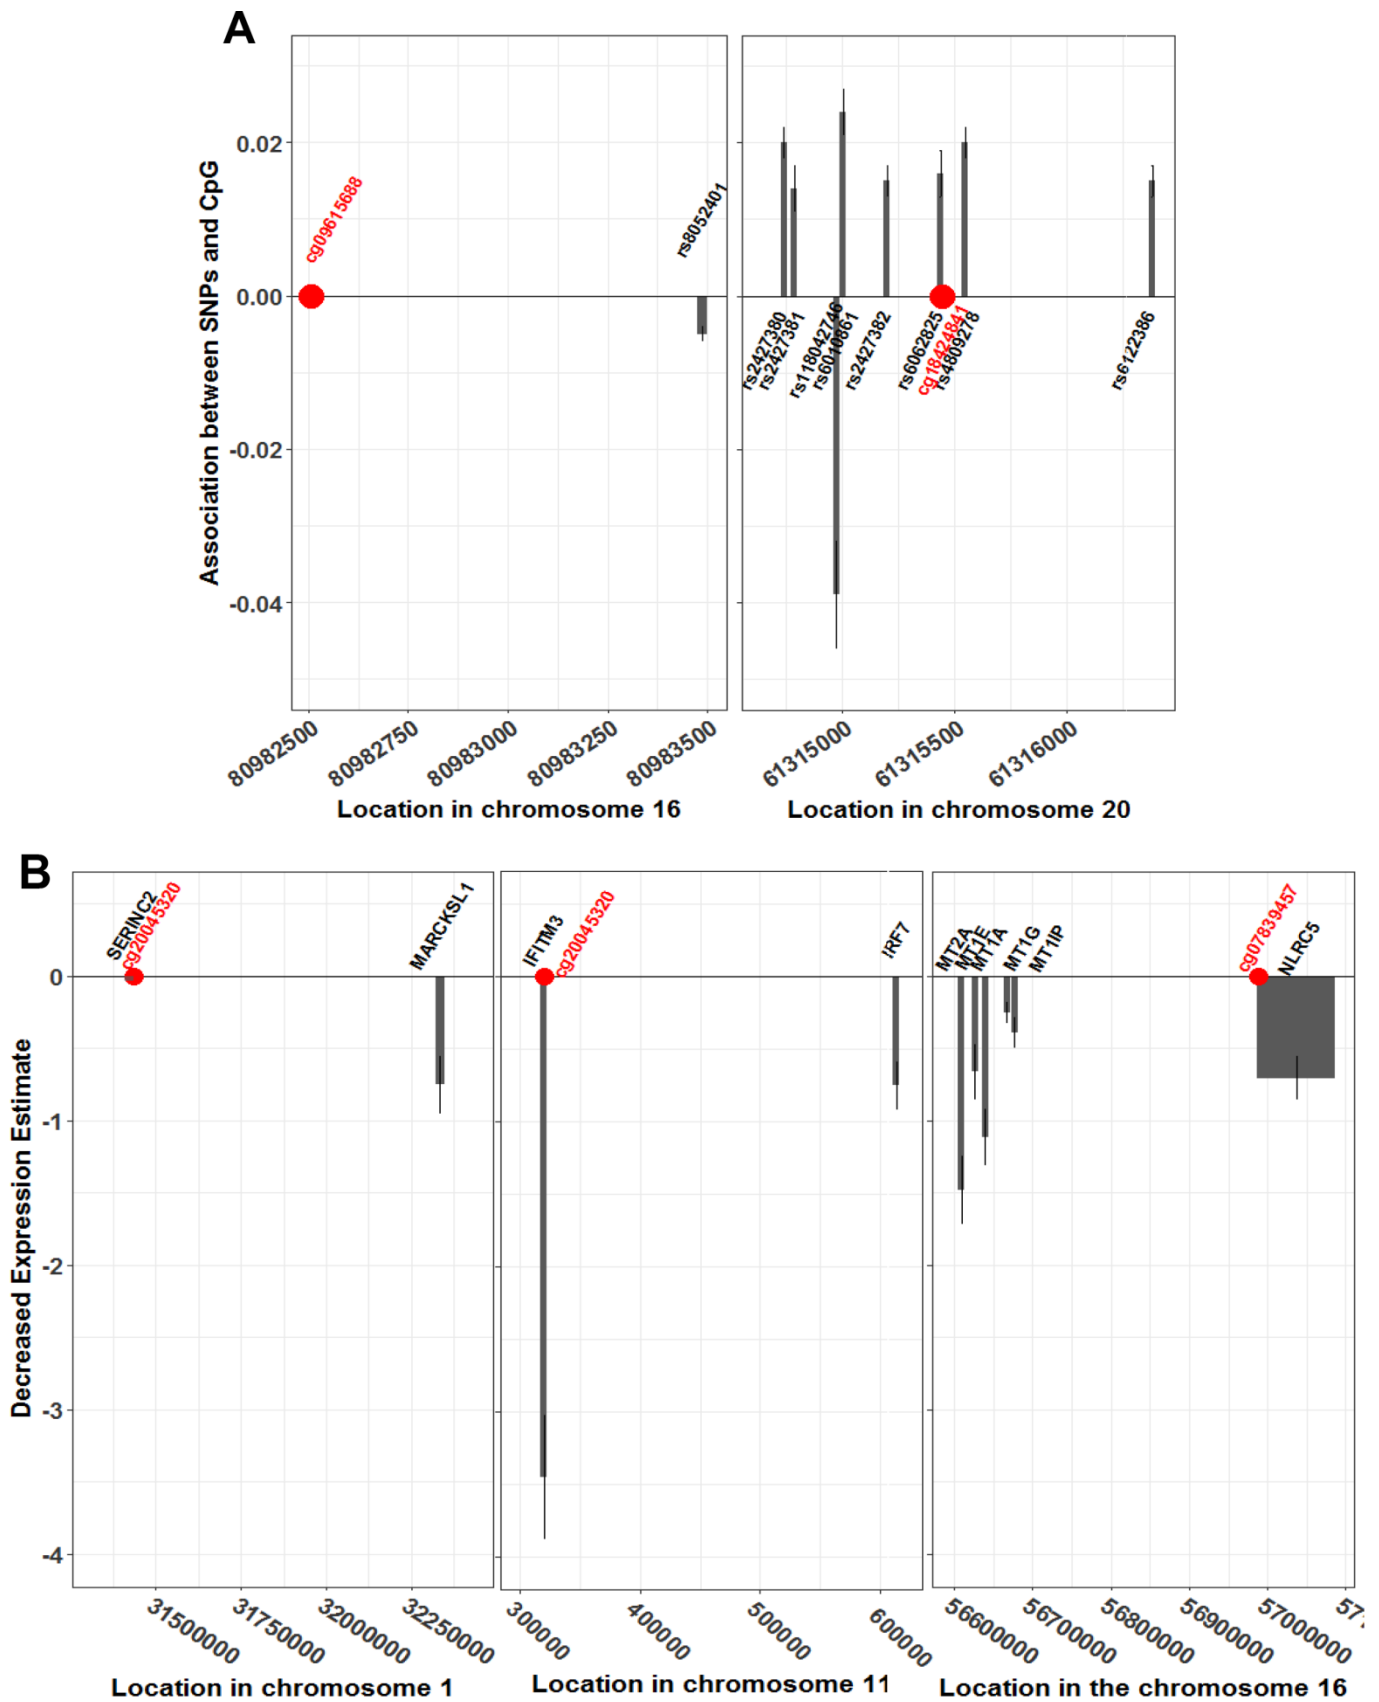

**Supplementary Figure 3.** (A) Methylation quantitative trait loci (meQTL) analysis and (B) expression quantitative trait methylation (eQTM) analysis in KORA.
