# Supplementary material for: Blood DNA methylation sites predict death risk in a longitudinal study of 12, 300 individuals
Source: publisher site journal article supplement (doi:10.18632/aging.103408), 2020-07-22
Supplement: Supplementary file [file aging-v12i14-103408-supplementary-material-SD5.pdf]

## SUPPLEMENTARY TABLES

**Supplementary Table 3. CpG loci where blood DNA methylation was associated (FDR<0.05) with all-cause mortality in the fixed-effect meta-analysis from the fully adjusted model.**

| Probe name | CHR | Distance to nearest gene (bp) | Nearest gene (10 Mp) <sup>a</sup> | Gene group | Relation to CpG Island | HR <sup>b</sup> | 95% CI      | <i>p</i> | Mean methylation level | Bonferroni significance | FDR-significant in basic model | Methylation level (Mean±SD) |
|------------|-----|-------------------------------|-----------------------------------|------------|------------------------|-----------------|-------------|----------|------------------------|-------------------------|--------------------------------|-----------------------------|
| cg17086398 | 1   | 0                             | <i>SERINC2</i>                    | Body       |                        | 1.25            | (1.15;1.36) | 4.86E-07 | 0.29                   |                         | 1                              | 0.29 ± 0.06                 |
| cg14866069 | 4   | 579                           | <i>BMPRI3</i>                     |            |                        | 0.66            | (0.56;0.78) | 4.85E-07 | 0.85                   |                         |                                | 0.85 ± 0.05                 |
| cg23666362 | 4   | 516                           | <i>MIR1973</i>                    | TSS1500    |                        | 0.69            | (0.59;0.8)  | 8.00E-07 | 0.82                   |                         |                                | 0.81 ± 0.04                 |
| cg12619262 | 7   | 6276                          | <i>CHST12</i>                     |            |                        | 1.26            | (1.16;1.37) | 1.76E-07 | 0.75                   |                         |                                | 0.75 ± 0.07                 |
| cg20045320 | 11  | 116                           | <i>IFITM3</i>                     |            | S_Shore                | 0.85            | (0.8;0.9)   | 4.06E-09 | 0.54                   | 1                       | 1                              | 0.54 ± 0.09                 |
| cg07677157 | 12  |                               | NA <sup>a</sup>                   |            |                        | 0.79            | (0.72;0.86) | 2.00E-07 | 0.16                   |                         | 1                              | 0.18 ± 0.06                 |
| cg07839457 | 16  | 435                           | <i>NLRC5</i>                      | TSS1500    | N_Shore                | 0.87            | (0.84;0.91) | 2.40E-09 | 0.46                   | 1                       | 1                              | 0.45 ± 0.11                 |
| cg09615688 | 16  |                               | NA <sup>a</sup>                   |            |                        | 0.53            | (0.41;0.68) | 9.32E-07 | 0.91                   |                         | 1                              | 0.90 ± 0.03                 |
| cg18424841 | 20  |                               | NA <sup>a</sup>                   |            | Island                 | 1.2             | (1.13;1.28) | 2.80E-08 | 0.7                    | 1                       |                                | 0.69 ± 0.09                 |

<sup>a</sup>Nearest gene was far more than 10 Mp.

<sup>b</sup>Effect estimates represent hazard ratio per 10% increase in DNA methylation. CHR = chromosome; HR = hazard ratio; 95% CI = 95% confidence interval; *p* = *p*-value; SD = standard deviation.

**Supplementary Table 4. Hazard ratios for FDR-significant fully-adjusted CpGs in basic and fully adjusted models CHR = chromosome; HR = hazard ratio; 95% CI = 95% confidence interval; *p* = *p*-value; SD = standard deviation.**

| Probe name | CHR | Fully adjusted model |              |          | Basic model |              |          |
|------------|-----|----------------------|--------------|----------|-------------|--------------|----------|
|            |     | HR                   | 95% CI       | <i>p</i> | HR          | 95% CI       | <i>p</i> |
| cg17086398 | 1   | 1.25                 | (1.15; 1.36) | 4.86E-07 | 1.37        | (1.28; 1.47) | 5.32E-20 |
| cg14866069 | 4   | 0.66                 | (0.56; 0.78) | 4.85E-07 | 0.84        | (0.75; 0.94) | 2.21E-03 |
| cg23666362 | 4   | 0.69                 | (0.59; 0.8)  | 8.04E-07 | 0.81        | (0.72; 0.9)  | 2.02E-04 |
| cg12619262 | 7   | 1.26                 | (1.15; 1.38) | 1.76E-07 | 1.13        | (1.05; 1.21) | 6.77E-04 |
| cg20045320 | 11  | 0.85                 | (0.80; 0.90) | 4.06E-09 | 0.82        | (0.78; 0.86) | 2.61E-16 |
| cg07677157 | 12  | 0.79                 | (0.72; 0.86) | 2.00E-07 | 0.78        | (0.72; 0.84) | 1.31E-10 |
| cg07839457 | 16  | 0.87                 | (0.84; 0.91) | 2.40E-09 | 0.88        | (0.85; 0.92) | 3.40E-11 |
| cg09615688 | 16  | 0.53                 | (0.41; 0.68) | 9.32E-07 | 0.60        | (0.51; 0.72) | 8.96E-09 |
| cg18424841 | 20  | 1.20                 | (1.13; 1.28) | 2.80E-08 | 1.10        | (1.05; 1.15) | 2.00E-04 |

**Supplementary Table 5. Summary of models.**

| Cohorts     | Model used                              | Maximum # probes considered | Basic model |                      | Fully adjusted model |                      |
|-------------|-----------------------------------------|-----------------------------|-------------|----------------------|----------------------|----------------------|
|             |                                         |                             | Lambda      | FDR-significant CpGs | Lambda               | FDR-significant CpGs |
| ARIC        | Cox Regression                          | 406712                      | 2.46        | 226                  | 1.63                 | 5                    |
| FHS Study 1 | Cox Regression <sup>b</sup>             | 417934                      | 0.94        | 3                    | 1.04                 | 0                    |
| FHS Study 2 | Cox Regression <sup>b</sup>             | 407580                      | 1.32        | 17                   | 1.16                 | 1                    |
| InChianti   | Cox Regression                          | 407179                      | 1.41        | 0                    | 1.44                 | 0                    |
| KORA        | Cox Regression <sup>a</sup>             | 330133                      | 0.96        | 4                    | 0.94                 | 0                    |
| LBC 1921    | Cox Regression                          | 393529                      | 1.15        | 0                    | 1.22                 | 0                    |
| LBC 1936    | Cox Regression                          | 385450                      | 1.04        | 0                    | 1                    | 0                    |
| NAS         | Cox Regression                          | 395005                      | 0.86        | 0                    | 0.9                  | 0                    |
| TwinsUK     | Cox Regression <sup>a,c</sup>           | 426,120                     | 1.02        | 0                    | 0.98                 | 0                    |
| WHI-BAA23   | Cox Regression                          | 419176                      | 1.7         | 14                   | 2.02                 | 1                    |
| WHI-EMPC-EA | Cox Regression <sup>d</sup>             | 250537                      | 1.23        | 9                    | 0.93                 | 0                    |
| WHI-EMPC-AA | Cox Regression <sup>d</sup>             | 218018                      | 0.92        | 0                    | 1.09                 | 0                    |
| All cohorts | Fixed effect meta-analysis <sup>e</sup> | 426724                      | 1.12        | 257                  | 0.94                 | 9                    |

<sup>a</sup>Cohort used as predictor of residuals from linear regression analysis between each probe and sets of covariates.

<sup>b</sup>Cohort included cluster for family structure.

<sup>c</sup>Cohort included random intercepts for zygosity and family structure.

<sup>d</sup>Cohort considered only CpGs with coefficient of variation >5%.

<sup>e</sup>Analysis of each CpG site included results of at least three cohorts.

**Basic model:** adjusted for age (categories), gender, technical variables, white blood cell count.

**Fully adjusted model:** adjusted for age (categories), gender, technical variables, white blood cell count, education level, physical activity, smoking status, smoking consumption (packyears), body mass index (categories), alcohol consumption, prior coronary heart disease (y/n), diabetes (y/n), hypertension (y/n), cancer (y/n).

**Supplementary Table 7. I<sup>2</sup> measure of heterogeneity from random-effect meta-analysis in each FDR-significant fully-adjusted CpG.**

| Probe name | CHR | Distance to nearest gene (bp) | Nearest gene (10 Mp) <sup>a</sup> | Gene group | Relation to CpG island | I <sup>2</sup> |
|------------|-----|-------------------------------|-----------------------------------|------------|------------------------|----------------|
| cg17086398 | 1   | 0                             | <i>SERINC2</i>                    | Body       |                        | 0.02           |
| cg14866069 | 4   | 579                           | <i>BMPRI1B</i>                    |            |                        | 0              |
| cg23666362 | 4   | 516                           | <i>MIR1973</i>                    | TSS1500    |                        | 0.01           |
| cg12619262 | 7   | 6276                          | <i>CHST12</i>                     |            |                        | 0.01           |
| cg20045320 | 11  | 116                           | <i>IFITM3</i>                     |            | S_Shore                | 53.53          |
| cg07677157 | 12  |                               | NA <sup>a</sup>                   |            |                        | 0              |
| cg07839457 | 16  | 435                           | <i>NLRC5</i>                      | TSS1500    | N_Shore                | 0              |
| cg09615688 | 16  |                               | NA <sup>a</sup>                   |            |                        | 29.9           |
| cg18424841 | 20  |                               | NA <sup>a</sup>                   |            | Island                 | 2.65           |

<sup>a</sup>Nearest gene was far more than 10 Mp.

<sup>b</sup>Effect estimates represent hazard ratio per 10% increase in DNA methylation.

CHR = chromosome; HR = hazard ratio; 95% CI = 95% confidence interval; p = p-value; SD = standard deviation.

**Supplementary Table 8. FDR-significant fully-adjusted CpGs in fixed effect meta-analysis with exclusion of ARIC.**

| Probe name | CHR | Distance to nearest gene (bp) | Nearest gene (10 Mp) <sup>a</sup> | Gene group | Relation to CpG island | HR   | 95% CI       | <i>p</i> | Mean DNA methylation level |
|------------|-----|-------------------------------|-----------------------------------|------------|------------------------|------|--------------|----------|----------------------------|
| cg17086398 | 1   | 0                             | <i>SERINC2</i>                    | Body       |                        | 1.25 | (1.11; 1.41) | 3.80E-04 | 0.29                       |
| cg14866069 | 4   | 579                           | <i>BMPRI1B</i>                    |            |                        | 0.65 | (0.52; 0.8)  | 6.86E-05 | 0.84                       |
| cg23666362 | 4   | 516                           | <i>MIR1973</i>                    | TSS1500    |                        | 0.74 | (0.62; 0.89) | 1.35E-03 | 0.8                        |
| cg12619262 | 7   | 6276                          | <i>CHST12</i>                     |            |                        | 1.27 | (1.12; 1.45) | 3.31E-04 | 0.74                       |
| cg20045320 | 11  | 116                           | <i>IFITM3</i>                     |            | S_Shore                | 0.88 | (0.82; 0.95) | 8.76E-04 | 0.54                       |
| cg07677157 | 12  |                               | NA <sup>a</sup>                   |            |                        | 0.76 | (0.66; 0.87) | 4.78E-05 | 0.19                       |
| cg07839457 | 16  | 435                           | <i>NLRC5</i>                      | TSS1500    | N_Shore                | 0.86 | (0.81; 0.92) | 3.70E-06 | 0.45                       |
| cg09615688 | 16  |                               | NA <sup>a</sup>                   |            |                        | 0.53 | (0.41; 0.68) | 9.32E-07 | 0.89                       |
| cg18424841 | 20  |                               | NA <sup>a</sup>                   |            | Island                 | 1.17 | (1.08; 1.27) | 1.90E-04 | 0.68                       |

<sup>a</sup>Nearest gene was far more than 10 Mp.

<sup>b</sup>Effect estimates represent hazard ratio per 10% increase in DNA methylation.

CHR = chromosome; HR = hazard ratio; 95% CI = 95% confidence interval; *p* = *p*-value; SD = standard deviation.

**Supplementary Table 9. FDR-significant fully-adjusted CpGs in fixed effect meta-analysis with exclusion of WHI-Study 1.**

| Probe name | CHR | Distance to nearest gene (bp) | Nearest gene (10 Mp) <sup>a</sup> | Gene group | Relation to CpG island | HR   | 95% CI       | <i>p</i> | Mean DNA methylation level |
|------------|-----|-------------------------------|-----------------------------------|------------|------------------------|------|--------------|----------|----------------------------|
| cg17086398 | 1   | 0                             | <i>SERINC2</i>                    | Body       |                        | 1.26 | (1.15; 1.38) | 4.30E-07 | 0.29                       |
| cg14866069 | 4   | 579                           | <i>BMPRI1B</i>                    |            |                        | 0.67 | (0.56; 0.79) | 2.23E-06 | 0.85                       |
| cg23666362 | 4   | 516                           | <i>MIR1973</i>                    | TSS1500    |                        | 0.68 | (0.58; 0.79) | 1.16E-06 | 0.81                       |
| cg12619262 | 7   | 6276                          | <i>CHST12</i>                     |            |                        | 1.23 | (1.13; 1.35) | 5.93E-06 | 0.74                       |
| cg20045320 | 11  | 116                           | <i>IFITM3</i>                     |            | S_Shore                | 0.86 | (0.81; 0.91) | 2.94E-07 | 0.54                       |
| cg07677157 | 12  |                               | NA <sup>a</sup>                   |            |                        | 0.79 | (0.72; 0.87) | 2.57E-06 | 0.17                       |
| cg07839457 | 16  | 435                           | <i>NLRC5</i>                      | TSS1500    | N_Shore                | 0.87 | (0.84; 0.92) | 1.30E-08 | 0.45                       |
| cg09615688 | 16  |                               | NA <sup>a</sup>                   |            |                        | 0.53 | (0.4; 0.69)  | 2.57E-06 | 0.9                        |
| cg18424841 | 20  |                               | NA <sup>a</sup>                   |            | Island                 | 1.21 | (1.13; 1.3)  | 1.53E-08 | 0.69                       |

<sup>a</sup>Nearest gene was far more than 10 Mp.

<sup>b</sup>Effect estimates represent hazard ratio per 10% increase in DNA methylation.

CHR = chromosome; HR = hazard ratio; 95% CI = 95% confidence interval; *p* = *p*-value; SD = standard deviation.

**Supplementary Table 11. Miettinen’s population attributable factor for NAS, WHI-EMPC-EA, and WHI-EMPC-AA as well as weighted combination (average).**

| CpG        | NAS    | WHI-EMPC-EA | WHI-EMPC-AA | Mean   | SD   |
|------------|--------|-------------|-------------|--------|------|
| cg17086398 | 6.47   | 5.55        | 3.57        | 5.20   | 1.21 |
| cg14866069 | -17.20 | -6.77       | -20.09      | -14.69 | 5.72 |
| cg23666362 | -15.19 | .           | .           | -15.19 | 0.00 |
| cg12619262 | 7.33   | -1.18       | 4.27        | 3.48   | 3.52 |
| cg20045320 | -5.34  | -0.67       | -1.42       | -2.48  | 2.05 |
| cg07677157 | -7.29  | -9.43       | -27.86      | -14.86 | 9.23 |
| cg07839457 | -4.08  | -3.07       | -3.43       | -3.53  | 0.42 |
| cg09615688 | .      | 1.43        | .           | 1.43   | 0.00 |
| cg18424841 | 5.97   | 3.51        | 4.91        | 4.80   | 1.01 |

**Supplementary Table 13. Standardized betas identifying the linear relationship between FDR-significant fully-adjusted CpGs and epigenetic aging clock in NAS, after adjusting all conventional risk factors.**

| Epigenetic age                          | cg17086398  | cg14866069   | cg23666362   | cg12619262  | cg20045320  | cg07677157  | cg07839457   | cg18424841   |
|-----------------------------------------|-------------|--------------|--------------|-------------|-------------|-------------|--------------|--------------|
|                                         | Est (p)     | Est (p)      | Est (p)      | Est (p)     | Est (p)     | Est (p)     | Est (p)      | Est (p)      |
| Horvath epigenetic aging clock (years)  | -0.09(0.1)  | 0.03(0.51)   | 0.01(0.78)   | 0.23(0)     | -0.27(0)    | -0.13(0.02) | -0.19(0)     | 0.11(0.03)   |
| Hannum epigenetic aging clock (years)   | -0.07(0.24) | -0.17(0)     | -0.14(0.01)  | 0.36(0)     | -0.08(0.23) | -0.06(0.34) | -0.28(0)     | 0.18(0)      |
| Weidener epigenetic aging clock (years) | 0.02(0.69)  | -0.03(0.39)  | -0.01(0.72)  | 0.08(0.1)   | -0.07(0.11) | -0.04(0.46) | -0.04(0.41)  | 0.06(0.16)   |
| PhenoAge (years)                        | -0.04 (0.5) | -0.11 (0.01) | -0.11 (0.02) | 0.02 (0.76) | -0.27 (0)   | 0 (0.93)    | -0.19 (0)    | 0.13 (0.01)  |
| Mortality risk score                    | 0.04 (0.44) | -0.22 (0)    | -0.19 (0)    | 0.34 (0)    | -0.19 (0)   | -0.49 (0)   | -0.03 (0.57) | -0.07 (0.22) |

Est = estimate; p = p-value.

**Supplementary Table 14. Association with all-cause mortality and DNA methylation levels at FDR-significant CpGs, adjusting for epigenetic acceleration ages in the Normative Aging Study (NAS).**

| Association with mortality | CpG alone        | CpG + DNAmAge acceleration |                      | CpG + PhenoAge acceleration |                       |
|----------------------------|------------------|----------------------------|----------------------|-----------------------------|-----------------------|
|                            |                  | CpG                        | DNAmAge acceleration | CpG                         | PhenoAge acceleration |
|                            |                  | HR (95% CI)                | HR (95% CI)          | HR (95% CI)                 | HR (95% CI)           |
| cg17086398                 | 1.03 (0.83-1.27) | 1.02 (0.82-1.27)           | 0.99 (0.97-1.03)     | 1.02 (0.82-1.26)            | 1.01 (0.98-1.03)      |
| cg14866069                 | 0.44 (0.30-0.70) | 0.44 (0.30-0.69)           | 0.99 (0.97-1.02)     | 0.44 (0.28-0.70)            | 1.00 (0.98-1.03)      |
| cg23666362                 | 0.80 (0.52-1.23) | 0.80 (0.52-1.23)           | 1.00 (0.97-1.03)     | 0.78 (0.50-1.20)            | 1.01 (0.99-1.03)      |
| cg12619262                 | 1.08 (0.88-1.33) | 1.09 (0.89-1.34)           | 0.99 (0.97-1.02)     | 1.09 (0.88-1.33)            | 1.01 (0.98-1.03)      |
| cg20045320                 | 0.94 (0.81-1.09) | 0.93 (0.81-1.08)           | 0.99 (0.97-1.02)     | 0.94 (0.82-1.09)            | 1.01 (0.98-1.03)      |
| cg07677157                 | 0.70 (0.52-0.94) | 0.70 (0.52-0.94)           | 0.99 (0.97-1.02)     | 0.70 (0.52-0.94)            | 1.00 (0.98-1.03)      |
| cg07839457                 | 0.87 (0.78-0.97) | 0.86 (0.77-0.96)           | 0.99 (0.97-1.02)     | 0.87 (0.78-0.97)            | 1.01 (0.98-1.03)      |
| cg18424841                 | 1.09 (0.94-1.26) | 1.07 (0.92-1.25)           | 1.00 (0.97-1.02)     | 1.09 (0.94-1.26)            | 1.01 (0.98-1.03)      |

**Supplementary Table 15. Association with all-cause mortality and DNA methylation levels at FDR-significant CpGs adjusting for mortality risk score in the Normative Aging Study (NAS).**

| Association with mortality | CpG + mortality risk score |                    |                      |
|----------------------------|----------------------------|--------------------|----------------------|
|                            | CpG alone                  | CpG                | Mortality risk score |
|                            | HR (95% CI)                | HR (95% CI)        | HR (95% CI)          |
| cg17086398                 | 1.03 (0.83-1.27)           | 1.12 (0.89-1.41)   | 1.68 (1.15-2.47)     |
| cg14866069                 | 0.44 (0.30-0.70)           | 0.45 (0.28-0.74)   | 1.39 (0.95-2.04)     |
| cg23666362                 | 0.80 (0.52-1.23)           | 0.87 (0.55-1.36)   | 1.55 (1.06-2.27)     |
| cg12619262                 | 1.08 (0.88-1.33)           | 1.01 (0.81 – 1.26) | 1.60 (1.08-2.35)     |
| cg20045320                 | 0.94 (0.81-1.09)           | 0.96 (0.82-1.12)   | 1.57 (1.08-2.28)     |
| cg07677157                 | 0.70 (0.52-0.94)           | 0.74 (0.55-1.01)   | 1.46 (1.00-2.14)     |
| cg07839457                 | 0.87 (0.78-0.97)           | 0.88 (0.79-0.99)   | 1.51 (1.05-2.18)     |
| cg18424841                 | 1.09 (0.94-1.26)           | 1.07 (0.92-1.24)   | 1.59 (1.10-2.30)     |

**Supplementary Table 16. Enrichment analysis for genes identified in GWAS of death-related factors.**

| Disease            | Gene           | Enrichment p-value | Enrichment_FDR |
|--------------------|----------------|--------------------|----------------|
| Alcohol dependence | <i>SERINC2</i> | 0.002              | 0.004          |
| HDL cholesterol    | <i>NLRC5</i>   | 0.022              | 0.022          |

p = p-value; FDR = false discovery rate.

**Supplementary Table 18. Pathways analysis with DAVID.**

| Gene           | Official gene name                          | Diseases                                                                                                                                                                                                                                                                                                                                           | Disease class                                                                        | p     |
|----------------|---------------------------------------------|----------------------------------------------------------------------------------------------------------------------------------------------------------------------------------------------------------------------------------------------------------------------------------------------------------------------------------------------------|--------------------------------------------------------------------------------------|-------|
| <i>NLRC5</i>   | NLR family CARD domain containing 5         | Chronic renal failure, kidney failure, chronic coronary disease, erythrocyte count, type 2 diabetes                                                                                                                                                                                                                                                | CARDIOVASCULAR, HEMATOLOGICAL, METABOLIC, RENAL                                      | >0.05 |
| <i>BMPRI1B</i> | Bone morphogenetic protein receptor type 1B | Alcoholism, attention deficit disorder with hyperactivity, bone mineral density, cleft lip, cleft palate, hypertension, increased ovulation rate, juvenile polyposis, obesity, premature ovarian failure, polycystic ovarian syndrome, primary ovarian insufficiency, puberty (delayed), puberty (precocious), thrombophilia, tobacco use disorder | CARDIOVASCULAR, CHEMDEPENDENCY, DEVELOPMENTAL, METABOLIC, OTHER, PSYCH, REPRODUCTION | >0.05 |
| <i>CHST12</i>  | Carbohydrate sulfotransferase 12            | Malaria, placenta diseases, pregnancy complications, parasitic                                                                                                                                                                                                                                                                                     | INFECTION                                                                            | >0.05 |
| <i>IFITM3</i>  | Interferon induced transmembrane protein 3  | Ulcerative colitis                                                                                                                                                                                                                                                                                                                                 | IMMUNE                                                                               | >0.05 |

**Supplementary Table 19. Association between fully-adjusted FDR-significant CpGs and SNPs (meQTL analysis) in KORA.**

| Fully-adjusted FDR-significant CpGs |     |          | SNP         |     |          | Est.   | SE    | p        |
|-------------------------------------|-----|----------|-------------|-----|----------|--------|-------|----------|
| Name                                | CHR | Position | Name        | CHR | Position |        |       |          |
| cg09615688                          | 16  | 80982506 | rs8052401   | 16  | 80983487 | -0.005 | 0.001 | 3.81E-08 |
| cg18424841                          | 20  | 61315444 | rs2427380   | 20  | 61314740 | 0.020  | 0.002 | 2.27E-16 |
| cg18424841                          | 20  | 61315444 | rs2427381   | 20  | 61314785 | 0.014  | 0.003 | 2.50E-08 |
| cg18424841                          | 20  | 61315444 | rs118042746 | 20  | 61314972 | -0.039 | 0.007 | 2.47E-09 |
| cg18424841                          | 20  | 61315444 | rs6010861   | 20  | 61315002 | 0.024  | 0.003 | 9.67E-17 |
| cg18424841                          | 20  | 61315444 | rs2427382   | 20  | 61315199 | 0.015  | 0.002 | 6.91E-10 |
| cg18424841                          | 20  | 61315444 | rs6062825   | 20  | 61315436 | 0.016  | 0.003 | 2.37E-06 |
| cg18424841                          | 20  | 61315444 | rs4809278   | 20  | 61315545 | 0.020  | 0.002 | 6.81E-16 |
| cg18424841                          | 20  | 61315444 | rs6122386   | 20  | 61316386 | 0.015  | 0.002 | 6.20E-10 |

CHR = chromosome; Est = estimate; SE = standard error; p = p-value.

**Supplementary Table 20. Association between fully-adjusted FDR-significant CpGs and gene expression (eQTM analysis) in KORA.**

| Probe name | CHR | Distance to nearest gene (bp) | Nearest gene   | Influenced gene name | Est   | SE   | p        | FDR      |
|------------|-----|-------------------------------|----------------|----------------------|-------|------|----------|----------|
| cg17086398 | 1   | 0                             | <i>SERINC2</i> | <i>MARCKSL1</i>      | -0.75 | 0.20 | 1.77E-04 | 5.92E-03 |
| cg20045320 | 11  | 116                           | <i>IFITM3</i>  | <i>IFITM3</i>        | -3.45 | 0.43 | 3.19E-15 | 7.48E-13 |
| cg20045320 | 11  | 116                           | <i>IFITM3</i>  | <i>IRF7</i>          | -0.76 | 0.17 | 8.78E-06 | 4.11E-04 |
| cg07839457 | 16  | 435                           | <i>NLRC5</i>   | <i>MT2A</i>          | -1.48 | 0.24 | 7.92E-10 | 9.27E-08 |
| cg07839457 | 16  | 435                           | <i>NLRC5</i>   | <i>MT1E</i>          | -0.66 | 0.19 | 5.17E-04 | 1.34E-02 |
| cg07839457 | 16  | 435                           | <i>NLRC5</i>   | <i>MT1A</i>          | -1.11 | 0.20 | 1.98E-08 | 1.54E-06 |
| cg07839457 | 16  | 435                           | <i>NLRC5</i>   | <i>MT1G</i>          | -0.25 | 0.07 | 6.70E-04 | 1.57E-02 |
| cg07839457 | 16  | 435                           | <i>NLRC5</i>   | <i>MT1IP</i>         | -0.39 | 0.10 | 1.64E-04 | 5.92E-03 |
| cg07839457 | 16  | 435                           | <i>NLRC5</i>   | <i>NLRC5</i>         | -0.70 | 0.15 | 3.67E-06 | 2.15E-04 |

CHR = chromosome; Est = estimate; SE = standard error; p = p-value; FDR = false discovery rate.

**Supplementary Table 21. Causal association between coronary heart disease, kidney function (serum creatinine), and methylation at FDR-significant CpGs in KORA and ARIES.**

| Disease                | Methylation locus | OR     | 95% LCI | 95% UCI | P      | methQTL cohort | N SNPs | MR method       |
|------------------------|-------------------|--------|---------|---------|--------|----------------|--------|-----------------|
| Coronary heart disease | cg09615688        | 1.508  | 1.0199  | 2.2297  | 0.0395 | KORA           | 1      | Wald ratio      |
|                        | cg18424841        | 1.0058 | 0.9994  | 1.0122  | 0.0743 | ARIES          | 1      | Wald ratio      |
|                        | cg18424841        | 0.8506 | 0.7292  | 0.9922  | 0.0944 | KORA           | 7      | MR Egger        |
|                        | cg18424841        | 1.01   | 0.9218  | 1.1068  | 0.8375 | KORA           | 7      | Weighted mode   |
|                        | cg18424841        | 1.0007 | 0.9399  | 1.0656  | 0.9814 | KORA           | 7      | Weighted median |
| Serum creatinine       | cg09615688        | 0.8816 | 0.7449  | 1.0435  | 0.1429 | KORA           | 1      | Wald ratio      |
|                        | cg18424841        | 1.0014 | 0.9989  | 1.0039  | 0.2771 | ARIES          | 1      | Wald ratio      |
|                        | cg18424841        | 0.9279 | 0.8297  | 1.0377  | 0.4148 | KORA           | 3      | MR Egger        |
|                        | cg18424841        | 0.9903 | 0.957   | 1.0246  | 0.6305 | KORA           | 3      | Weighted mode   |
|                        | cg18424841        | 0.9939 | 0.9637  | 1.025   | 0.6969 | KORA           | 3      | Weighted median |

Odds ratio (OR), lower 95% confidence interval (LCI), and upper 95% confidence interval (UCI) given per 10% higher methylation. Associations for coronary heart disease taken from (PMC4589895) and association for serum creatinine taken from (PMC4735748). Associations for ARIES methQTLs extracted from MR-base (PMC5976434) using middle age estimates for methQTLs from ARIES cohort (PMC4818469). MR = mendelian randomization; N SNPs = number of SNPs (instruments) used for the MR analyses; P = p-value.

**Supplementary Table 22. Association of neutrophil–lymphocyte ratio (NLR) with all-cause mortality, with and without adjustment for cell type proportion in Normative Aging Study.**

| NLR association with mortality | Without adjusting for cell proportions |          | Adjusting for cell proportions |          |
|--------------------------------|----------------------------------------|----------|--------------------------------|----------|
|                                | HR (95% CI)                            | <i>p</i> | HR (95% CI)                    | <i>p</i> |
| without any CpG inclusion      | 1.08 (1.00 – 1.17)                     | 0.04     | 1.06 (0.92 – 1.21)             | 0.43     |
| cg17086398                     | 1.08 (1.00 – 1.17)                     | 0.045    | 1.06 (0.93 – 1.21)             | 0.41     |
| cg14866069                     | 1.13 (1.05 – 1.22)                     | 0.002    | 1.03 (0.90 – 1.18)             | 0.68     |
| cg23666362                     | 1.10 (1.02 – 1.19)                     | 0.017    | 1.04 (0.90 – 1.20)             | 0.61     |
| cg12619262                     | 1.08 (1.00 – 1.17)                     | 0.042    | 1.05 (0.92 – 1.21)             | 0.45     |
| cg20045320                     | 1.08 (1.00 – 1.17)                     | 0.042    | 1.05 (0.92 – 1.20)             | 0.46     |
| cg07677157                     | 1.09 (1.01 – 1.18)                     | 0.034    | 1.06 (0.93 – 1.21)             | 0.39     |
| cg07839457                     | 1.07 (0.99 – 1.15)                     | 0.06     | 1.00 (0.88 – 1.15)             | 0.97     |
| cg18424841                     | 1.10 (1.02 – 1.19)                     | 0.02     | 1.06 (0.93 – 1.21)             | 0.38     |
