# Supplementary material for: Blood DNA methylation sites predict death risk in a longitudinal study of 12,300 individuals
Source: Aging (Albany NY). 2020 Jul 22;12(14):14092–124. doi: 10.18632/aging.103408 (PMC7425458; doi:10.18632/aging.103408)
Supplement: Supplementary Table 1 [file aging-12-103408-s002..xlsx]

## Sheet: Sheet1
Table S1. Covariates included in the analysis of each cohort (*variables that differ across cohorts due to type of cutoff used in data collection)
SD = standard deviation; CHD = coronary heart disease
Cohort	Participants (N)	Deaths (N)	Time (years) to death/last follow-up (mean±SD)	Age	Female	Smoking status	Smoking status	BMI	Alcohol comsuption	Physical activity	Type 2 diabetes	CHD or hypertension	Cancer diagnosis
				(Mean±SD)	(N, %)	(% former, % current)	(% ever, % never)	(mean±SD)
Total	12300	2561
ARIC	2780	1026	16.62 ± 5.6	57 ± 6	1762 (63)	30; 25	55; 45	30.11 ± 6.25	*	*	*	*	*
FHS Study 1	2144	162	6.08 ± 1.13	65 ± 9	1290 (60)	49; 12	61; 39	28.18 ± 5.45	*	*	*	*	*
FHS Study 2	485	76	5.90 ± 1.44	71 ± 8	144 (30)	58; 9	67; 33	28.79 ± 4.90	*	*	*	*	*
InChianti	480	91	14.59 ± 1.42	63 ± 16	281 (59)	25; 20	45; 55	27.1 ± 3.93	*		*	*	*
KORA	1257	42	4.35 ± 0.62	61 ± 9	720 (57)	42; 14	56; 44	28.08 ± 4.92	*	*	*	*	*
LBC 1921	384	267	9.26 ± 4.02	79 ± 1	269 (70)	54; 8	63; 37	26.16 ± 4.02	*		*	*	*
LBC 1936	719	84	7.36 ± 1.5	70 ± 1	454 (63)	54; 14	68; 32	27.77 ± 4.37	*		*	*	*
NAS	647	221	10.58 ± 3.29	73 ± 7	0 (0)	67; 4	71; 29	28.12 ± 4.03	*	*	*	*	*
TwinsUK	775	30	8.92 ± 3.36	58 ± 10	720 (93)	32; 11	43; 57	26.68 ± 5.05	*		*	*	*
WHI-BAA23	998	309	14.44 ± 3.52	68 ± 6	998 (100)	45; 1	46; 54	28.83 ± 5.69	*	*	*	*	*
WHI-EMPC-EA	1077	180	11.47 ± 3.44	65 ± 7	1077 (100)	40; 8	48; 52	28.82 ± 5.87	*	*	*	*	*
WHI-EMPC-AA	554	73	10.64 ± 3.74	63 ± 7	554 (100)	39; 10	49; 51	31.45 ± 6.04	*	*	*	*	*
