# Supplementary material for: Blood DNA methylation sites predict death risk in a longitudinal study of 12,300 individuals
Source: Aging (Albany NY). 2020 Jul 22;12(14):14092–124. doi: 10.18632/aging.103408 (PMC7425458; doi:10.18632/aging.103408)
Supplement: Supplementary Table 2 [file aging-12-103408-s005..xlsx]

## Sheet: Sheet1
Table S2. CpG loci where blood DNA methylation was associated (FDR<0.05) with all-cause mortality in fixed-effect meta-analysis from the basic model (i.e., age, gender, technical covariates, and white cell subtypes )
a Nearest gene was far more than 10 Mbp.
b Effect estimates represent hazard ratio per 10% increase in DNA methylation.
CHR = chromosome; HR = hazard ratio; 95% CI = 95% confidence interval; p = p-value; SD = standard deviation
Probe name	CHR	Nearest gene (10 Mbp) a	Gene group	Relation to CpG island	HRb	95% CI	p	Mean DNA methylation level	Bonferroni significance	Mean ± SD methylation level
cg16736630	1	LINC01128	Body		1.15131	(1.09; 1.22)	8.37e-07	0.508338		0.5 ± 0.51
cg00695214	1	ATAD3B	Body	N_Shore	0.804932	(0.74; 0.87)	1.16e-07	0.925504	1	0.92 ± 0.91
cg20664247	1	PEX10	TSS1500;TSS1500	N_Shore	0.813676	(0.75; 0.89)	3.09e-06	0.678783		0.66 ± 0.66
cg16985952	1	KAZN	Body;Body		1.21675	(1.11; 1.33)	2.31e-05	0.181479		0.19 ± 0.19
cg16694480	1	CAPZB	Body		1.36174	(1.24; 1.5)	1.22e-10	0.684761	1	0.67 ± 0.67
cg23799313	1	PAQR7	TSS1500	N_Shelf	0.765375	(0.69; 0.85)	1.24e-06	0.649899		0.63 ± 0.63
cg14024502	1	FCN3	TSS1500	S_Shore	0.632547	(0.52; 0.77)	5.45e-06	0.874447		0.86 ± 0.86
cg17086398	1	SERINC2	Body		1.37487	(1.28; 1.47)	5.32e-20	0.287198	1	0.29 ± 0.29
cg16401270	1	KHDRBS1	TSS1500;TSS1500	S_Shore	0.599748	(0.49; 0.73)	8.29e-07	0.057394		0.06 ± 0.06
cg21545605	1	COL8A2		N_Shore	0.808929	(0.74; 0.89)	1.11e-05	0.608295		0.59 ± 0.59
cg14033638	1	RRAGC		S_Shore	0.756322	(0.67; 0.86)	1.81e-05	0.868151		0.86 ± 0.86
cg24049493	1	HIVEP3	TSS1500;TSS1500	S_Shore	1.0724	(1.04; 1.1)	2.33e-06	0.222306		0.23 ± 0.24
cg09409484	1	LINC01144	Body	S_Shore	0.782206	(0.72; 0.85)	4.66e-09	0.572201	1	0.56 ± 0.56
cg25189904	1	GNG12-AS1	TSS1500	S_Shore	0.94274	(0.92; 0.97)	1.89e-05	0.452394		0.45 ± 0.45
cg04955573	1	GFI1	Body;Body;Body	N_Shore	0.867491	(0.81; 0.93)	2.49e-05	0.466997		0.45 ± 0.44
cg09662411	1	GFI1	Body;Body;Body	Island	0.924376	(0.89; 0.95)	2.01e-06	0.800698		0.78 ± 0.78
cg18146737	1	GFI1	Body;Body;Body	Island	0.9354	(0.91; 0.96)	1.95e-05	0.926836		0.92 ± 0.92
cg12876356	1	GFI1	Body;Body;Body	Island	0.927176	(0.9; 0.96)	1.23e-06	0.819413		0.8 ± 0.8
cg04535902	1	GFI1	Body;Body;Body	Island	0.823628	(0.75; 0.9)	2.03e-05	0.87941		0.87 ± 0.87
cg03437741	1	PTGFRN	Body		0.69233	(0.6; 0.79)	1.38e-07	0.864154		0.87 ± 0.87
cg14476101	1	PHGDH	Body	S_Shore	0.934844	(0.91; 0.96)	1.75e-05	0.634271		0.62 ± 0.62
cg16254756	1	SHC1	5'UTR;5'UTR;TSS1500;TSS1500	N_Shelf	0.746294	(0.68; 0.82)	5.37e-10	0.492609	1	0.48 ± 0.48
cg12643083	1	FCGR2A	Body;Body		0.882992	(0.84; 0.93)	6.15e-06	0.277193		0.27 ± 0.27
cg17591816	1	DNM3	Body;Body		0.880925	(0.84; 0.93)	3.92e-07	0.5183		0.5 ± 0.49
cg03044573	1	GAS5	Body;TSS1500;TSS200;TSS1500;TSS1500	N_Shore	0.888499	(0.84; 0.94)	1.85e-05	0.486073		0.47 ± 0.47
cg21815704	1	GLRX2	TSS1500;TSS200	S_Shore	0.906652	(0.87; 0.95)	7.5e-06	0.486777		0.47 ± 0.46
cg07586235	1	KIF14			0.896851	(0.86; 0.94)	4.31e-07	0.4227		0.41 ± 0.4
cg11071448	1	SYT2	5'UTR;5'UTR		0.810781	(0.76; 0.86)	4.91e-11	0.497696	1	0.48 ± 0.48
cg15149095	1	SYT14	Body;Body;Body;Body;Body;Body	Island	1.25167	(1.14; 1.37)	2.48e-06	0.170449		0.17 ± 0.17
cg21446172	1	CAPN8	Body	S_Shore	0.697616	(0.63; 0.77)	1.88e-12	0.756944	1	0.74 ± 0.74
cg08460732	2	CYS1		N_Shelf	0.886038	(0.84; 0.93)	1.43e-06	0.298638		0.29 ± 0.29
cg08787988	2	IFT172	TSS1500	S_Shore	0.895009	(0.85; 0.94)	6.72e-06	0.463086		0.47 ± 0.48
cg09697978	2	PRKD3	Body		0.916695	(0.88; 0.95)	8.07e-06	0.492639		0.47 ± 0.46
cg14965639	2	STON1-GTF2A1L	TSS200		0.935158	(0.91; 0.96)	1.21e-05	0.332524		0.33 ± 0.33
cg02243157	2	VPS54			0.904969	(0.87; 0.94)	2.4e-06	0.574034		0.55 ± 0.55
cg15612945	2	VPS54	5'UTR;5'UTR	N_Shelf	0.916315	(0.88; 0.95)	2.02e-05	0.563547		0.54 ± 0.54
cg15132282	2	LINC00309			0.874341	(0.83; 0.92)	1.6e-06	0.352825		0.34 ± 0.33
cg02059927	2	M1AP			0.911668	(0.88; 0.95)	9.21e-06	0.44415		0.43 ± 0.43
cg09732563	2	POLE4	3'UTR		0.525567	(0.42; 0.66)	1.52e-08	0.910159	1	0.9 ± 0.9
cg10827754	2	NMS		S_Shelf	0.922048	(0.89; 0.96)	2.85e-05	0.505567		0.48 ± 0.48
cg13482326	2	CCDC93	Body		0.67176	(0.56; 0.81)	2.24e-05	0.831587		0.82 ± 0.82
cg18899117	2	PARD3B	Body;Body;Body		0.893802	(0.85; 0.94)	1.29e-06	0.390316		0.37 ± 0.37
cg13903421	2	WNT6	3'UTR	Island	1.06213	(1.03; 1.09)	2.04e-05	0.539065		0.53 ± 0.52
cg25242471	2	WNT6	3'UTR	Island	1.07116	(1.04; 1.1)	1.23e-06	0.362769		0.35 ± 0.35
cg22175006	2	ACSL3	5'UTR;5'UTR		0.910283	(0.87; 0.95)	3.64e-06	0.451691		0.43 ± 0.42
cg19674851	2	AP1S3			0.906722	(0.87; 0.95)	7.74e-06	0.527789		0.51 ± 0.5
cg05876232	2	SP140L	TSS1500;TSS1500		0.785793	(0.7; 0.88)	1.89e-05	0.818846		0.82 ± 0.82
cg24172324	2	ARMC9		N_Shore	1.08179	(1.05; 1.12)	2.57e-06	0.377712		0.37 ± 0.38
cg05951221	2	ALPI		Island	0.902255	(0.87; 0.93)	5.47e-10	0.401458	1	0.4 ± 0.4
cg21566642	2	ALPI		Island	0.897049	(0.87; 0.92)	2.7e-12	0.465414	1	0.47 ± 0.47
cg01940273	2	ALPI		Island	0.908818	(0.88; 0.94)	3.82e-09	0.621535	1	0.61 ± 0.61
cg09859932	2	LOC100286922			0.62746	(0.51; 0.77)	8.49e-06	0.859067		0.85 ± 0.85
cg26269881	3	BHLHE40	Body	N_Shore	0.85251	(0.8; 0.9)	6.91e-08	0.216416	1	0.21 ± 0.21
cg06059360	3	NKTR	Body		0.903298	(0.86; 0.94)	7.09e-06	0.566999		0.55 ± 0.54
cg04949153	3	CADPS	Body;Body;Body		1.06737	(1.04; 1.1)	2.33e-05	0.422597		0.42 ± 0.42
cg24150385	3	LRIG1	Body		0.762947	(0.7; 0.83)	2.92e-10	0.789551	1	0.78 ± 0.78
cg12992827	3	ZPLD1			0.920209	(0.89; 0.95)	1.59e-06	0.750055		0.74 ± 0.74
cg26225417	3	MIR548A3			1.06863	(1.04; 1.1)	1.84e-05	0.317768		0.33 ± 0.33
cg22930808	3	PARP9	5'UTR;5'UTR;TSS1500;5'UTR;5'UTR;5'UTR;5'UTR	N_Shore	0.935158	(0.91; 0.96)	6.06e-06	0.702863		0.69 ± 0.69
cg08122652	3	PARP9	5'UTR;5'UTR;TSS1500;5'UTR;5'UTR;5'UTR;5'UTR	N_Shore	0.923833	(0.89; 0.95)	1.07e-06	0.823427		0.82 ± 0.82
cg00959259	3	PARP9	5'UTR;5'UTR;TSS1500;5'UTR;5'UTR;5'UTR;5'UTR	N_Shore	0.922053	(0.9; 0.95)	2.86e-08	0.577519	1	0.57 ± 0.57
cg15607142	3	RPN1			0.876098	(0.83; 0.92)	1.27e-06	0.41883		0.4 ± 0.4
cg13498650	3	PLSCR2			0.836624	(0.78; 0.9)	1.79e-06	0.87011		0.87 ± 0.87
cg06981309	3	PLSCR1	5'UTR	N_Shore	0.914101	(0.88; 0.94)	1.07e-07	0.503733	1	0.49 ± 0.49
cg08124030	3	TM4SF1	1stExon		0.938759	(0.91; 0.96)	3.68e-06	0.77105		0.76 ± 0.75
cg11630392	3	GPR171	1stExon;Body;5'UTR		1.14464	(1.09; 1.21)	5.53e-07	0.514973		0.51 ± 0.52
cg06168950	3	GPR149			0.913217	(0.88; 0.95)	2.97e-05	0.547363		0.53 ± 0.52
cg11639615	3	TMEM212			0.920879	(0.89; 0.96)	1.71e-05	0.571235		0.55 ± 0.55
cg17797940	3	FNDC3B	5'UTR;5'UTR	S_Shore	0.915145	(0.88; 0.95)	1.6e-05	0.51249		0.5 ± 0.5
cg10028625	3	ECT2	Body		0.913058	(0.88; 0.95)	3.84e-06	0.554394		0.53 ± 0.53
cg06160853	3	NLGN1		N_Shelf	0.880658	(0.84; 0.92)	1.18e-08	0.34213	1	0.33 ± 0.32
cg24513937	3	PSMD2	TSS200	Island	1.50288	(1.32; 1.72)	1.5e-09	0.0478541	1	0.04 ± 0.04
cg05754973	3	UBXN7	Body	N_Shore	0.546907	(0.42; 0.71)	3.39e-06	0.895531		0.89 ± 0.89
cg25941209	4	FAM53A	Body	N_Shelf	0.700584	(0.59; 0.83)	3.03e-05	0.81019		0.82 ± 0.82
cg16506970	4	KIAA0232	5'UTR;5'UTR		0.917136	(0.88; 0.95)	1.2e-05	0.453331		0.43 ± 0.42
cg11036672	4	TRMT44	Body		1.49399	(1.26; 1.78)	6.16e-06	0.824741		0.8 ± 0.8
cg17075352	4	JCHAIN	TSS1500		0.835352	(0.78; 0.9)	3.35e-07	0.509886		0.49 ± 0.49
cg05805852	4	TMEM150C			0.632564	(0.53; 0.76)	4.07e-07	0.818756		0.81 ± 0.81
cg06690548	4	SLC7A11	Body		0.926902	(0.9; 0.96)	2.46e-06	0.88942		0.88 ± 0.88
cg21434376	4	TNRC18P1	Body		1.20539	(1.11; 1.3)	3.68e-06	0.57793		0.57 ± 0.57
cg05618426	4	EDNRA	TSS200;TSS200;TSS200	N_Shore	1.07099	(1.04; 1.11)	2.7e-05	0.490048		0.48 ± 0.48
cg21058391	4	MIR3688-2		S_Shelf	0.81091	(0.77; 0.86)	1.19e-13	0.566665	1	0.56 ± 0.56
cg09232805	4	GALNTL6	Body		0.860198	(0.81; 0.92)	3.09e-06	0.38864		0.37 ± 0.37
cg14022913	4	NEIL3	TSS1500	N_Shore	0.885339	(0.85; 0.93)	6.24e-08	0.394155	1	0.38 ± 0.37
cg23576855	5	AHRR	Body	N_Shore	0.924377	(0.9; 0.94)	2.55e-12	0.666051	1	0.65 ± 0.65
cg05575921	5	AHRR	Body	N_Shore	0.880897	(0.86; 0.9)	9.51e-22	0.811451	1	0.82 ± 0.82
cg08971334	5	ZDHHC11			0.683036	(0.6; 0.78)	3.24e-08	0.97416	1	0.98 ± 0.98
cg16594311	5	ZDHHC11	Body		0.673114	(0.56; 0.81)	2.66e-05	0.935248		0.93 ± 0.93
cg18720622	5	SLC6A18	Body	S_Shore	1.12838	(1.07; 1.19)	2.31e-05	0.653231		0.66 ± 0.67
cg09134819	5	LINC02145		S_Shelf	1.0721	(1.04; 1.11)	2.72e-05	0.283048		0.28 ± 0.29
cg26646867	5	OCLN		N_Shelf	0.885489	(0.85; 0.93)	2.49e-07	0.373235		0.36 ± 0.35
cg06532574	5	ELL2	Body	N_Shore	0.861563	(0.82; 0.9)	5.58e-10	0.614964	1	0.59 ± 0.59
cg21184216	5	C5orf30	5'UTR	S_Shelf	0.835657	(0.78; 0.89)	9.41e-08	0.681275	1	0.68 ± 0.68
cg07022591	5	FER			1.07397	(1.04; 1.11)	2.04e-05	0.767627		0.76 ± 0.76
cg21760006	5	DTWD2			1.07335	(1.04; 1.11)	1.41e-05	0.720177		0.71 ± 0.72
cg26369418	5	CSF2	TSS200		0.676487	(0.6; 0.77)	9.03e-10	0.161086	1	0.17 ± 0.17
cg24119717	5	LINC01024		S_Shore	0.924655	(0.89; 0.96)	4.38e-06	0.741682		0.73 ± 0.73
cg00549219	5	LOC728554		N_Shore	0.84061	(0.78; 0.91)	2.59e-05	0.432707		0.42 ± 0.42
cg26050975	5	MGAT4B	Body;TSS1500	N_Shore	0.732521	(0.64; 0.84)	6.63e-06	0.110473		0.12 ± 0.12
cg13962347	6	LYRM4	Body;Body		1.09502	(1.05; 1.14)	2.36e-06	0.325529		0.33 ± 0.34
cg27213238	6	GCNT2	Body		0.912842	(0.87; 0.95)	2.83e-05	0.521928		0.5 ± 0.51
cg15786664	6	LOC100129636			0.560482	(0.46; 0.69)	2.01e-08	0.891928	1	0.89 ± 0.89
cg08231349	6	HLA-J	TSS1500	Island	1.41034	(1.21; 1.64)	9.49e-06	0.0505441		0.06 ± 0.06
cg06126421	6	DDR1			0.894212	(0.87; 0.92)	1.8e-13	0.701464	1	0.68 ± 0.68
cg24859433	6	DDR1			0.919594	(0.89; 0.96)	1.54e-05	0.858885		0.85 ± 0.85
cg22880122	6	HCG22	Body		0.869139	(0.82; 0.92)	6.77e-06	0.554929		0.54 ± 0.54
cg21600878	6	SKIV2L	Body	N_Shelf	0.683678	(0.59; 0.79)	2.25e-07	0.827284		0.81 ± 0.81
cg08818207	6	TAP1	Body	N_Shore	0.758259	(0.68; 0.85)	1.19e-06	0.461664		0.46 ± 0.47
cg07715777	6	HLA-DPB2		N_Shore	0.812584	(0.74; 0.89)	2.43e-05	0.639251		0.62 ± 0.62
cg26987613	6	VPS52	Body	S_Shore	0.70264	(0.63; 0.79)	9.32e-10	0.489709	1	0.48 ± 0.48
cg18118738	6	UHRF1BP1	Body		0.902684	(0.87; 0.94)	9.6e-07	0.399547		0.38 ± 0.38
cg03546163	6	FKBP5	5'UTR;5'UTR;5'UTR;5'UTR	N_Shore	0.902663	(0.88; 0.93)	1.1e-10	0.575937	1	0.56 ± 0.56
cg25114611	6	LOC285847	TSS1500;Body	S_Shore	0.924685	(0.89; 0.96)	1.17e-05	0.320804		0.32 ± 0.32
cg25325512	6	PIM1	3'UTR	S_Shelf	0.762042	(0.71; 0.82)	4.13e-13	0.356241	1	0.35 ± 0.35
cg16175713	6	CYP39A1	Body	N_Shelf	0.870923	(0.83; 0.91)	2.08e-09	0.370954	1	0.36 ± 0.36
cg16196201	6	GSTA2	Body		0.740182	(0.65; 0.85)	1.73e-05	0.781653		0.78 ± 0.78
cg09931909	6	MB21D1	Body	N_Shore	0.874066	(0.83; 0.92)	4.5e-07	0.594899		0.58 ± 0.58
cg13547127	6	EPM2A			1.08168	(1.05; 1.12)	5e-06	0.415176		0.41 ± 0.41
cg19384905	6	FBXO5	5'UTR;Body	N_Shelf	0.878641	(0.83; 0.93)	8.17e-07	0.326632		0.31 ± 0.31
cg16279088	6	TULP4		Island	1.24404	(1.13; 1.37)	9.82e-06	0.0792599		0.07 ± 0.07
cg17501210	6	RPS6KA2	Body;Body		0.904611	(0.87; 0.94)	5.71e-09	0.71554	1	0.71 ± 0.71
cg17406963	6	RPS6KA2	Body		0.621349	(0.5; 0.78)	2.71e-05	0.889095		0.88 ± 0.88
cg07512236	6	KIF25		Island	0.317701	(0.19; 0.52)	6.45e-06	0.967584		0.97 ± 0.97
cg21248060	7	C7orf50	Body;Body;Body	Island	1.24109	(1.14; 1.35)	3.87e-07	0.841955		0.85 ± 0.86
cg10089657	7	C7orf50	Body;TSS200;Body;Body	Island	1.29101	(1.16; 1.44)	3.98e-06	0.704544		0.69 ± 0.69
cg26944426	7	HDAC9		N_Shelf	1.06694	(1.04; 1.1)	7.67e-06	0.34193		0.35 ± 0.35
cg08822075	7	NFE2L3	Body	S_Shore	0.844356	(0.81; 0.88)	1.99e-13	0.300001	1	0.29 ± 0.28
cg13081213	7	SKAP2	Body		0.91886	(0.89; 0.95)	1.24e-06	0.768964		0.76 ± 0.75
cg21277889	7	LOC646762	Body	N_Shelf	0.844934	(0.8; 0.89)	1.28e-09	0.389326	1	0.38 ± 0.38
cg14248429	7	AVL9	3'UTR		0.538214	(0.42; 0.69)	9.52e-07	0.921145		0.91 ± 0.91
cg12741293	7	ABHD11-AS1		S_Shelf	0.789263	(0.71; 0.88)	9.93e-06	0.73772		0.72 ± 0.72
cg06445343	7	PPP1R9A	TSS1500;5'UTR;TSS1500;TSS1500;5'UTR	S_Shore	0.822355	(0.76; 0.89)	3.71e-06	0.716751		0.7 ± 0.7
cg02745912	7	EPHB6		N_Shore	1.13225	(1.07; 1.2)	1.7e-05	0.378554		0.37 ± 0.38
cg14358164	7	OR2A25	1stExon		0.862841	(0.81; 0.92)	2.57e-05	0.776751		0.8 ± 0.8
cg00738772	7	ZNF777			1.0833	(1.04; 1.12)	1.78e-05	0.588378		0.58 ± 0.58
cg05241143	7	PTPRN2	Body;Body;Body	N_Shelf	0.723037	(0.62; 0.84)	1.4e-05	0.803443		0.8 ± 0.8
cg03326563	8	TDH	TSS1500		0.595051	(0.48; 0.74)	5.68e-06	0.892449		0.88 ± 0.88
cg24312537	8	PLEKHA2	TSS1500;3'UTR	N_Shore	0.919341	(0.88; 0.96)	2.53e-05	0.539946		0.52 ± 0.51
cg10819004	8	NKAIN3	Body		0.753563	(0.67; 0.85)	5.49e-06	0.849076		0.84 ± 0.84
cg26598831	8	YTHDF3-AS1			1.06836	(1.04; 1.1)	1.58e-05	0.656928		0.65 ± 0.65
cg20217649	8	SNHG6	TSS1500;Body	N_Shelf	0.743509	(0.66; 0.84)	8.5e-07	0.312426		0.31 ± 0.31
cg12162100	8	CPNE3	5'UTR	S_Shelf	0.911031	(0.88; 0.95)	1.69e-06	0.534122		0.51 ± 0.51
cg27484483	8	RRM2B	Body	N_Shore	0.871318	(0.83; 0.92)	7.68e-07	0.502795		0.48 ± 0.48
cg27039118	8	TRPS1	Body		0.939677	(0.91; 0.97)	1.76e-05	0.629485		0.62 ± 0.62
cg05020510	8	NOV	TSS1500	N_Shore	0.942294	(0.92; 0.97)	1.95e-05	0.410405		0.41 ± 0.41
cg22396119	8	HAS2			0.861937	(0.82; 0.91)	1.36e-08	0.330265	1	0.32 ± 0.32
cg22581352	8	SLC45A4		Island	0.835402	(0.77; 0.91)	1.74e-05	0.398732		0.39 ± 0.38
cg13818830	9	RGS3	Body;Body;TSS1500		0.638548	(0.52; 0.79)	2.99e-05	0.876296		0.86 ± 0.86
cg14204415	9	PKN3	1stExon;5'UTR	Island	1.3292	(1.18; 1.49)	1.32e-06	0.0543672		0.04 ± 0.04
cg13567403	9	UBAC1			0.815837	(0.76; 0.88)	5.35e-08	0.561243	1	0.54 ± 0.54
cg12866551	10	ARL5B			0.794243	(0.73; 0.87)	3.13e-07	0.768608		0.76 ± 0.76
cg19257478	10	SKIDA1	Body	Island	2.47511	(1.72; 3.56)	1.11e-06	0.0381634		0.04 ± 0.04
cg08930843	10	ZNF438	5'UTR;5'UTR;5'UTR;5'UTR;5'UTR;5'UTR;5'UTR;Body		0.894166	(0.85; 0.94)	2.51e-06	0.422721		0.4 ± 0.4
cg07125981	10	CUL2	Body		0.907343	(0.87; 0.95)	1.85e-05	0.532813		0.51 ± 0.51
cg24740647	10	SGPL1		S_Shelf	0.895194	(0.85; 0.94)	4.91e-06	0.37746		0.36 ± 0.35
cg02307823	10	PTEN	Body		0.892145	(0.86; 0.93)	9.56e-08	0.491555	1	0.47 ± 0.47
cg20087457	10	CYP2C18	TSS1500;TSS1500		0.691567	(0.59; 0.81)	8.92e-06	0.89318		0.89 ± 0.89
cg06071730	10	MXI1	Body;Body;Body		0.88716	(0.84; 0.94)	1.69e-05	0.550572		0.53 ± 0.53
cg18325866	10	FAM160B1	Body;Body	S_Shelf	0.864744	(0.81; 0.92)	2.76e-06	0.543683		0.53 ± 0.53
cg20143985	10	ZRANB1		S_Shelf	0.712464	(0.63; 0.81)	1.87e-07	0.761355		0.75 ± 0.75
cg13521018	10	INPP5A	Body		1.11736	(1.06; 1.17)	1.29e-05	0.630189		0.65 ± 0.65
cg23570810	11	IFITM1	Body	N_Shore	0.928324	(0.9; 0.96)	1.86e-06	0.619359		0.62 ± 0.63
cg20045320	11	IFITM1		S_Shore	0.82165	(0.78; 0.86)	2.61e-16	0.535426	1	0.54 ± 0.54
cg04446326	11	PSMA1	Body		0.812108	(0.74; 0.9)	2.96e-05	0.858353		0.87 ± 0.87
cg12083965	11	CALCA	TSS1500;TSS1500;TSS1500	Island	1.66704	(1.33; 2.09)	9.9e-06	0.024718		0.02 ± 0.02
cg21493660	11	CHST1			0.616165	(0.51; 0.74)	2.36e-07	0.806596		0.8 ± 0.8
cg14822525	11	STX3	TSS1500	S_Shore	0.848834	(0.79; 0.91)	3.04e-06	0.784673		0.81 ± 0.81
cg26250585	11	MS4A6A	TSS200;TSS200;TSS200		0.841846	(0.79; 0.9)	8.84e-07	0.213458		0.21 ± 0.21
cg26241658	11	ALDH3B1	Body;Body;Body	S_Shore	0.670718	(0.56; 0.81)	1.83e-05	0.856665		0.85 ± 0.85
cg09784886	11	KRTAP5-11	TSS200		1.0747	(1.04; 1.11)	2.42e-05	0.409109		0.4 ± 0.41
cg22797700	11	KRTAP5-11		N_Shelf	0.836431	(0.78; 0.9)	2.67e-06	0.720503		0.74 ± 0.74
cg27095222	11	GRM5-AS1			0.780826	(0.73; 0.84)	1.49e-12	0.213846	1	0.21 ± 0.21
cg08351489	11	FAT3	Body		1.07913	(1.04; 1.12)	8.07e-06	0.364849		0.36 ± 0.36
cg14106710	11	LOC283177			1.0696	(1.04; 1.1)	2.76e-05	0.544436		0.54 ± 0.54
cg21448167	12	TSPAN9	Body;Body		0.827101	(0.76; 0.9)	1.3e-05	0.960382		0.96 ± 0.96
cg03846111	12	ATF7IP	5'UTR		0.873954	(0.82; 0.93)	8.46e-06	0.364201		0.36 ± 0.36
cg20989409	12	ERP27	TSS1500		0.669205	(0.56; 0.8)	1.39e-05	0.934625		0.93 ± 0.93
cg15845673	12	BCAT1	Body	N_Shelf	0.905624	(0.87; 0.95)	1.6e-05	0.464032		0.45 ± 0.44
cg27552493	12	FAM19A2		N_Shore	0.855155	(0.8; 0.91)	2.33e-06	0.374446		0.36 ± 0.37
cg07677157	12	MSRB3			0.780861	(0.72; 0.84)	1.31e-10	0.164452	1	0.17 ± 0.18
cg19871235	12	TSPAN8	TSS1500		1.07752	(1.05; 1.11)	1.33e-06	0.72134		0.71 ± 0.71
cg00761125	12	ELK3	5'UTR	S_Shore	0.81407	(0.76; 0.87)	5.69e-10	0.290918	1	0.29 ± 0.29
cg15545247	12	HCAR3	1stExon;5'UTR		0.874667	(0.83; 0.92)	2.26e-08	0.425105	1	0.4 ± 0.4
cg13617280	12	SLC15A4	Body;TSS200		1.18868	(1.1; 1.28)	7.86e-06	0.796012		0.79 ± 0.8
cg03636488	12	EP400	Body		1.18741	(1.11; 1.27)	7.02e-07	0.168999		0.17 ± 0.18
cg10274208	13	SLC25A15			1.19047	(1.11; 1.28)	3.55e-06	0.113546		0.1 ± 0.1
cg20489946	13	NEK3	5'UTR;5'UTR;5'UTR;Body	N_Shelf	0.834181	(0.77; 0.9)	4.78e-06	0.407353		0.4 ± 0.4
cg21408813	13	UTP14C		S_Shelf	0.884556	(0.84; 0.93)	4.46e-06	0.69649		0.69 ± 0.69
cg00246969	13	STK24	Body;Body		0.823899	(0.75; 0.9)	2.82e-05	0.856571		0.85 ± 0.84
cg25084760	13	PCCA	Body;Body		0.909695	(0.87; 0.95)	1.67e-05	0.455305		0.43 ± 0.43
cg14196263	13	COL4A2		S_Shelf	0.855042	(0.8; 0.91)	1.15e-06	0.212288		0.2 ± 0.2
cg03676947	13	TEX29		N_Shelf	0.423808	(0.3; 0.6)	1.92e-06	0.93144		0.94 ± 0.94
cg01620379	14	RNASE11	Body		0.876664	(0.83; 0.93)	6.22e-06	0.406091		0.39 ± 0.39
cg13020868	14	NOVA1		S_Shelf	1.07594	(1.04; 1.11)	2.87e-05	0.76037		0.76 ± 0.76
cg04285477	14	ELMSAN1	Body;Body		0.744106	(0.68; 0.82)	3.5e-10	0.936474	1	0.94 ± 0.94
cg10825315	14	TSHR	Body;Body;Body		1.07312	(1.04; 1.11)	2.95e-05	0.380567		0.38 ± 0.39
cg13525276	14	TSHR	Body;Body;Body		1.08515	(1.05; 1.12)	8.31e-07	0.305161		0.31 ± 0.31
cg18625627	14	TSHR	Body;Body;Body		1.08058	(1.05; 1.12)	5.03e-06	0.242716		0.25 ± 0.25
cg15827092	14	TSHR			0.815243	(0.77; 0.86)	5.87e-12	0.608071	1	0.6 ± 0.6
cg23625388	14	RIN3	Body		0.898774	(0.86; 0.94)	7.75e-06	0.431926		0.42 ± 0.41
cg04987734	14	CDC42BPB	Body		1.07813	(1.04; 1.11)	1.16e-05	0.401908		0.4 ± 0.4
cg09587957	15	BMF	TSS1500;TSS1500;TSS1500;5'UTR	N_Shore	0.821972	(0.76; 0.89)	4.81e-06	0.272145		0.26 ± 0.26
cg12735498	15	CATSPER2P1	TSS200;Body	N_Shore	1.24668	(1.13; 1.37)	5.87e-06	0.517975		0.51 ± 0.51
cg05061769	15	FAM81A			0.898272	(0.86; 0.94)	9.92e-06	0.457806		0.44 ± 0.44
cg19670693	15	ANXA2			1.33186	(1.18; 1.5)	2.96e-06	0.0982755		0.11 ± 0.11
cg11426726	15	USP3	Body		0.901884	(0.86; 0.94)	3.75e-06	0.346433		0.34 ± 0.34
cg13615491	15	PEAK1	TSS1500	Island	2.18415	(1.54; 3.09)	1.09e-05	0.0324634		0.03 ± 0.03
cg03746015	16	CLEC16A	Body		0.747572	(0.7; 0.8)	2.4e-15	0.772021	1	0.76 ± 0.76
cg03071793	16	SNN	TSS1500	S_Shore	0.865851	(0.81; 0.92)	6.28e-06	0.278716		0.27 ± 0.27
cg06437100	16	OTOA	Body;Body;Body	N_Shore	0.817758	(0.75; 0.89)	7.51e-06	0.142743		0.14 ± 0.14
cg27118035	16	ZNF267	Body		1.07956	(1.04; 1.12)	1.66e-05	0.134359		0.14 ± 0.14
cg04102325	16	SALL1		Island	1.35408	(1.18; 1.55)	1.13e-05	0.132402		0.14 ± 0.14
cg07839457	16	FAM192A	TSS1500	N_Shore	0.882298	(0.85; 0.92)	3.4e-11	0.456285	1	0.45 ± 0.45
cg08368934	16	ADGRG3	TSS1500		0.866698	(0.81; 0.92)	6.56e-06	0.44804		0.43 ± 0.43
cg06575692	16	DUS2	3'UTR		1.07778	(1.04; 1.11)	1.15e-05	0.488712		0.48 ± 0.48
cg09615688	16	CDYL2			0.60209	(0.51; 0.72)	8.96e-09	0.911548	1	0.9 ± 0.9
cg01545556	16	BANP		S_Shelf	0.798973	(0.72; 0.88)	1.35e-05	0.816104		0.82 ± 0.82
cg04387347	16	ZFPM1	Body	Island	1.13621	(1.08; 1.2)	5.44e-06	0.229226		0.23 ± 0.22
cg15137213	17	VPS53	Body;Body		1.07522	(1.04; 1.11)	2.14e-05	0.591187		0.59 ± 0.59
cg00630007	17	NXN	Body	S_Shore	0.889218	(0.84; 0.94)	1.77e-05	0.921802		0.92 ± 0.92
cg04856396	17	P2RX5	Body;Body		1.10943	(1.06; 1.16)	1.71e-06	0.583209		0.57 ± 0.56
cg21371645	17	CTDNEP1	3'UTR;3'UTR	S_Shore	0.675781	(0.56; 0.81)	2.88e-05	0.830184		0.82 ± 0.82
cg18370923	17	CDRT15P1	TSS1500		0.503542	(0.37; 0.69)	1.99e-05	0.916698		0.91 ± 0.91
cg23992493	17	MAP2K3		S_Shore	0.782709	(0.71; 0.86)	1.49e-06	0.826071		0.82 ± 0.82
cg24751155	17	FOXN1			0.755908	(0.67; 0.85)	3.67e-06	0.750909		0.74 ± 0.74
cg20480274	17	SEZ6	Body;Body	Island	1.07551	(1.04; 1.11)	2.61e-05	0.8341		0.82 ± 0.82
cg17036458	17	SSH2	Body		0.907371	(0.87; 0.94)	1.61e-06	0.465489		0.44 ± 0.44
cg07124642	17	NT5C3B	Body	N_Shore	0.838375	(0.78; 0.9)	2.33e-06	0.51424		0.51 ± 0.51
cg14562086	17	COL1A1	TSS1500	S_Shore	1.07532	(1.04; 1.11)	1.56e-05	0.360687		0.35 ± 0.35
cg11015353	17	FBF1		S_Shelf	0.495336	(0.37; 0.65)	8.13e-07	0.932904		0.92 ± 0.92
cg18181703	17	SOCS3	Body	N_Shore	0.920506	(0.89; 0.95)	6.18e-06	0.459984		0.45 ± 0.45
cg12377874	18	CCDC68	TSS1500	N_Shore	0.844372	(0.8; 0.9)	3.35e-08	0.63184	1	0.63 ± 0.64
cg03404572	18	SERPINB3	TSS200		0.826228	(0.78; 0.88)	3.8e-09	0.435551	1	0.42 ± 0.42
cg06954658	18	SALL3	TSS200	Island	1.36801	(1.21; 1.55)	6.11e-07	0.0659293		0.07 ± 0.07
cg02147126	19	AZU1	TSS200		0.872412	(0.82; 0.93)	5.35e-06	0.431193		0.42 ± 0.41
cg05032384	19	SBNO2	Body	N_Shelf	0.680406	(0.57; 0.81)	1.37e-05	0.84205		0.84 ± 0.84
cg00473597	19	RFX2	5'UTR;5'UTR	N_Shore	0.68555	(0.6; 0.78)	3.63e-08	0.837533	1	0.83 ± 0.83
cg26674132	19	ZNF559	TSS1500	N_Shore	1.17215	(1.09; 1.26)	9.39e-06	0.250126		0.22 ± 0.23
cg10604476	19	ICAM5	Body	Island	1.05365	(1.03; 1.08)	1.27e-05	0.508568		0.53 ± 0.53
cg21201109	19	KANK2	5'UTR	N_Shore	0.772162	(0.7; 0.86)	1.41e-06	0.727606		0.71 ± 0.71
cg22914338	19	ADGRL1		Island	0.878369	(0.83; 0.93)	9.73e-06	0.809906		0.81 ± 0.81
cg03636183	19	F2RL3	Body	N_Shore	0.892753	(0.87; 0.92)	3.16e-14	0.683803	1	0.67 ± 0.68
cg00814328	19	ZNF492		S_Shore	0.722721	(0.63; 0.83)	7.61e-06	0.814577		0.8 ± 0.8
cg15094920	19	CEACAM3	TSS1500		0.712452	(0.61; 0.84)	2.88e-05	0.0940175		0.1 ± 0.1
cg26470501	19	BCL3	Body	S_Shore	0.920483	(0.89; 0.95)	5.51e-06	0.525381		0.52 ± 0.52
cg27152890	19	PPP1R13L	Body;Body	Island	1.05997	(1.03; 1.09)	6.73e-06	0.416865		0.41 ± 0.4
cg22891070	19	HIF3A	Body;TSS200	S_Shore	0.942877	(0.92; 0.97)	5.03e-06	0.539467		0.52 ± 0.51
cg05825244	20	EBF4	Body	Island	1.05263	(1.03; 1.08)	6.08e-06	0.537802		0.55 ± 0.55
cg13693517	20	TASP1	5'UTR	N_Shelf	1.08993	(1.05; 1.13)	3.81e-07	0.259748		0.26 ± 0.27
cg06824795	20	BPIFA2	Body		1.07466	(1.04; 1.11)	1.38e-05	0.555755		0.55 ± 0.55
cg14184078	20	CBLN4	5'UTR;1stExon	Island	1.17689	(1.09; 1.27)	2.14e-05	0.250277		0.25 ± 0.25
cg26033254	20	SOX18	TSS200	N_Shore	2.06324	(1.49; 2.85)	1.12e-05	0.0321993		0.03 ± 0.03
cg05306070	21	TRPM2			1.16726	(1.09; 1.25)	5.57e-06	0.0980455		0.09 ± 0.09
cg13315706	21	ITGB2	TSS200;5'UTR		1.09921	(1.06; 1.14)	1.9e-07	0.340721		0.34 ± 0.35
cg00742649	22	XBP1	3'UTR;3'UTR		0.895758	(0.85; 0.94)	1.39e-05	0.367588		0.35 ± 0.35
cg22027471	22	RFPL3	TSS1500		1.07434	(1.04; 1.11)	1.72e-05	0.38121		0.39 ± 0.39
cg14425733	22	MIRLET7BHG	Body;TSS1500	S_Shore	0.800833	(0.72; 0.89)	1.46e-05	0.810908		0.8 ± 0.8
