# Supplementary material for: Blood DNA methylation sites predict death risk in a longitudinal study of 12,300 individuals
Source: Aging (Albany NY). 2020 Jul 22;12(14):14092–124. doi: 10.18632/aging.103408 (PMC7425458; doi:10.18632/aging.103408)
Supplement: Supplementary Table 6 [file aging-12-103408-s004..xlsx]

## Sheet: Sheet1
Table S6. I^2 measure of heterogeneity from random-effect meta-analysis in each FDR-significant basic-adjusted CpG
a Nearest gene was far more than 10 Mp.
b Effect estimates represent hazard ratio per 10% increase in DNA methylation.
CHR = chromosome; HR = hazard ratio; 95% CI = 95% confidence interval; p = p-value; SD = standard deviation
Probe name	CHR	MAPINFO	Nearest gene (10 Mp)a	Gene group	Relation to CpG island	I2
cg16736630	1	779995	LINC01128	Body		0
cg00695214	1	1415868	ATAD3B	Body	N_Shore	28.4534
cg20664247	1	2345475	PEX10	TSS1500;TSS1500	N_Shore	37.7079
cg16985952	1	15068172	KAZN	Body;Body		0
cg16694480	1	19732786	CAPZB	Body		0.255082
cg23799313	1	26198360	PAQR7	TSS1500	N_Shelf	40.6283
cg14024502	1	27693795	FCN3	TSS1500	S_Shore	25.8396
cg17086398	1	31896392	SERINC2	Body		16.5113
cg16401270	1	32404469	KHDRBS1	TSS1500;TSS1500	S_Shore	0
cg21545605	1	36590481	COL8A2		N_Shore	0
cg14033638	1	39175759	RRAGC		S_Shore	59.5658
cg24049493	1	42385941	HIVEP3	TSS1500;TSS1500	S_Shore	79.1381
cg09409484	1	45770648	LINC01144	Body	S_Shore	0
cg25189904	1	68299493	GNG12-AS1	TSS1500	S_Shore	87.4951
cg04955573	1	92944306	GFI1	Body;Body;Body	N_Shore	0.0191131
cg09662411	1	92946132	GFI1	Body;Body;Body	Island	76.3623
cg18146737	1	92946700	GFI1	Body;Body;Body	Island	73.8706
cg12876356	1	92946825	GFI1	Body;Body;Body	Island	77.035
cg04535902	1	92947332	GFI1	Body;Body;Body	Island	0
cg03437741	1	117491966	PTGFRN	Body		0.00320535
cg14476101	1	120255992	PHGDH	Body	S_Shore	70.1032
cg16254756	1	154943676	SHC1	5'UTR;5'UTR;TSS1500;TSS1500	N_Shelf	0
cg12643083	1	161476548	FCGR2A	Body;Body		0
cg17591816	1	172239092	DNM3	Body;Body		0
cg03044573	1	173835265	GAS5	Body;TSS1500;TSS200;TSS1500;TSS1500	N_Shore	0
cg21815704	1	193075249	GLRX2	TSS1500;TSS200	S_Shore	0
cg07586235	1	200385219	KIF14			0.0354465
cg11071448	1	202584465	SYT2	5'UTR;5'UTR		44.4968
cg15149095	1	210111672	SYT14	Body;Body;Body;Body;Body;Body	Island	7.05738
cg21446172	1	223745234	CAPN8	Body	S_Shore	38.0158
cg08460732	2	10256302	CYS1		N_Shelf	0.000211259
cg08787988	2	27713044	IFT172	TSS1500	S_Shore	47.6018
cg09697978	2	37501815	PRKD3	Body		24.1151
cg14965639	2	48795994	STON1-GTF2A1L	TSS200		59.1744
cg02243157	2	64047802	VPS54			0
cg15612945	2	64242453	VPS54	5'UTR;5'UTR	N_Shelf	30.712
cg15132282	2	64488961	LINC00309			0
cg02059927	2	74936232	M1AP			37.8617
cg09732563	2	75196679	POLE4	3'UTR		27.9038
cg10827754	2	101038262	NMS		S_Shelf	0.0061363
cg13482326	2	118700475	CCDC93	Body		0
cg18899117	2	206411031	PARD3B	Body;Body;Body		0.00571064
cg13903421	2	219738714	WNT6	3'UTR	Island	70.4041
cg25242471	2	219738732	WNT6	3'UTR	Island	63.8185
cg22175006	2	223757281	ACSL3	5'UTR;5'UTR		27.5374
cg19674851	2	224720888	AP1S3			60.2848
cg05876232	2	231279916	SP140L	TSS1500;TSS1500		0
cg24172324	2	232258363	ARMC9		N_Shore	46.169
cg05951221	2	233284402	ALPI		Island	92.0812
cg21566642	2	233284661	ALPI		Island	92.4973
cg01940273	2	233284934	ALPI		Island	92.4648
cg09859932	2	234684284	LOC100286922			0
cg26269881	3	5023310	BHLHE40	Body	N_Shore	23.1491
cg06059360	3	42657618	NKTR	Body		0.00763972
cg04949153	3	62704506	CADPS	Body;Body;Body		0
cg24150385	3	66543263	LRIG1	Body		0
cg12992827	3	101901234	ZPLD1			78.4713
cg26225417	3	103537959	MIR548A3			0.0701398
cg22930808	3	122281881	PARP9	5'UTR;5'UTR;TSS1500;5'UTR;5'UTR;5'UTR;5'UTR	N_Shore	67.6741
cg08122652	3	122281939	PARP9	5'UTR;5'UTR;TSS1500;5'UTR;5'UTR;5'UTR;5'UTR	N_Shore	68.881
cg00959259	3	122281975	PARP9	5'UTR;5'UTR;TSS1500;5'UTR;5'UTR;5'UTR;5'UTR	N_Shore	68.549
cg15607142	3	128420513	RPN1			0.008887
cg13498650	3	146129360	PLSCR2			0
cg06981309	3	146260954	PLSCR1	5'UTR	N_Shore	62.3414
cg08124030	3	149095283	TM4SF1	1stExon		64.9048
cg11630392	3	150920964	GPR171	1stExon;Body;5'UTR		7.98616
cg06168950	3	154737057	GPR149			11.0108
cg11639615	3	171543413	TMEM212			0
cg17797940	3	171759519	FNDC3B	5'UTR;5'UTR	S_Shore	49.9295
cg10028625	3	172494364	ECT2	Body		7.07505
cg06160853	3	174155855	NLGN1		N_Shelf	0.00854606
cg24513937	3	184016857	PSMD2	TSS200	Island	51.093
cg05754973	3	196157488	UBXN7	Body	N_Shore	0
cg25941209	4	1653552	FAM53A	Body	N_Shelf	0
cg16506970	4	6809109	KIAA0232	5'UTR;5'UTR		0.00776981
cg11036672	4	8476435	TRMT44	Body		0
cg17075352	4	71533675	JCHAIN	TSS1500		38.2691
cg05805852	4	83505549	TMEM150C			0
cg06690548	4	139162808	SLC7A11	Body		83.7839
cg21434376	4	141563054	TNRC18P1	Body		61.9439
cg05618426	4	148401958	EDNRA	TSS200;TSS200;TSS200	N_Shore	29.3836
cg21058391	4	160027487	MIR3688-2		S_Shelf	0
cg09232805	4	173935615	GALNTL6	Body		26.3807
cg14022913	4	178229651	NEIL3	TSS1500	N_Shore	0
cg23576855	5	373299	AHRR	Body	N_Shore	69.9438
cg05575921	5	373378	AHRR	Body	N_Shore	91.1832
cg08971334	5	770095	ZDHHC11			0
cg16594311	5	818145	ZDHHC11	Body		0
cg18720622	5	1229256	SLC6A18	Body	S_Shore	33.6383
cg09134819	5	5497464	LINC02145		S_Shelf	58.0048
cg26646867	5	68785451	OCLN		N_Shelf	0
cg06532574	5	95295740	ELL2	Body	N_Shore	70.2821
cg21184216	5	102598034	C5orf30	5'UTR	S_Shelf	0
cg07022591	5	106434764	FER			0
cg21760006	5	119214672	DTWD2			3.84072
cg26369418	5	131409352	CSF2	TSS200		0.00179237
cg24119717	5	139488731	LINC01024		S_Shore	52.7163
cg00549219	5	177370476	LOC728554		N_Shore	0.000592702
cg26050975	5	179231109	MGAT4B	Body;TSS1500	N_Shore	10.9123
cg13962347	6	5174647	LYRM4	Body;Body		0
cg27213238	6	10530035	GCNT2	Body		53.9666
cg15786664	6	28917329	LOC100129636			0
cg08231349	6	29894644	HLA-J	TSS1500	Island	66.3612
cg06126421	6	30720080	DDR1			90.3727
cg24859433	6	30720203	DDR1			88.5919
cg22880122	6	31027005	HCG22	Body		0
cg21600878	6	31935900	SKIV2L	Body	N_Shelf	0
cg08818207	6	32820355	TAP1	Body	N_Shore	0.0158057
cg07715777	6	33128963	HLA-DPB2		N_Shore	59.616
cg26987613	6	33219410	VPS52	Body	S_Shore	58.0633
cg18118738	6	34802849	UHRF1BP1	Body		47.7801
cg03546163	6	35654363	FKBP5	5'UTR;5'UTR;5'UTR;5'UTR	N_Shore	88.0038
cg25114611	6	35696870	LOC285847	TSS1500;Body	S_Shore	88.5093
cg25325512	6	37142220	PIM1	3'UTR	S_Shelf	45.0983
cg16175713	6	46617172	CYP39A1	Body	N_Shelf	0
cg16196201	6	52615988	GSTA2	Body		0
cg09931909	6	74160206	MB21D1	Body	N_Shore	72.803
cg13547127	6	145217150	EPM2A			0.0545452
cg19384905	6	153299788	FBXO5	5'UTR;Body	N_Shelf	0
cg16279088	6	158653551	TULP4		Island	48.5933
cg17501210	6	166970252	RPS6KA2	Body;Body		85.7897
cg17406963	6	167061885	RPS6KA2	Body		1.97795e-05
cg07512236	6	168591133	KIF25		Island	53.0149
cg21248060	7	1039957	C7orf50	Body;Body;Body	Island	19.6685
cg10089657	7	1062820	C7orf50	Body;TSS200;Body;Body	Island	3.65489
cg26944426	7	19182017	HDAC9		N_Shelf	0
cg08822075	7	26193607	NFE2L3	Body	S_Shore	74.2148
cg13081213	7	26714757	SKAP2	Body		72.2157
cg21277889	7	29721696	LOC646762	Body	N_Shelf	18.313
cg14248429	7	33046274	AVL9	3'UTR		21.0109
cg12741293	7	73136235	ABHD11-AS1		S_Shelf	57.2861
cg06445343	7	94538403	PPP1R9A	TSS1500;5'UTR;TSS1500;TSS1500;5'UTR	S_Shore	1.77136
cg02745912	7	142494204	EPHB6		N_Shore	0.0397945
cg14358164	7	143771673	OR2A25	1stExon		0
cg00738772	7	149053061	ZNF777			0
cg05241143	7	157916636	PTPRN2	Body;Body;Body	N_Shelf	42.3646
cg03326563	8	11195810	TDH	TSS1500		38.197
cg24312537	8	38831332	PLEKHA2	TSS1500;3'UTR	N_Shore	0
cg10819004	8	63403502	NKAIN3	Body		42.3112
cg26598831	8	64681200	YTHDF3-AS1			3.56311
cg20217649	8	67835351	SNHG6	TSS1500;Body	N_Shelf	17.175
cg12162100	8	87529647	CPNE3	5'UTR	S_Shelf	0.0153445
cg27484483	8	103249853	RRM2B	Body	N_Shore	7.46588
cg27039118	8	116575902	TRPS1	Body		71.7994
cg05020510	8	120428057	NOV	TSS1500	N_Shore	65.4101
cg22396119	8	122419020	HAS2			0
cg22581352	8	142219329	SLC45A4		Island	0
cg13818830	9	116326021	RGS3	Body;Body;TSS1500		42.5477
cg14204415	9	131464988	PKN3	1stExon;5'UTR	Island	28.0472
cg13567403	9	138861590	UBAC1			6.32096
cg12866551	10	20019641	ARL5B			16.9945
cg19257478	10	21806076	SKIDA1	Body	Island	43.8373
cg08930843	10	31182298	ZNF438	5'UTR;5'UTR;5'UTR;5'UTR;5'UTR;5'UTR;5'UTR;Body		39.3785
cg07125981	10	35330496	CUL2	Body		0
cg24740647	10	72681285	SGPL1		S_Shelf	0.0214914
cg02307823	10	89675901	PTEN	Body		0
cg20087457	10	96442154	CYP2C18	TSS1500;TSS1500		0.00448987
cg06071730	10	112021300	MXI1	Body;Body;Body		0.00539725
cg18325866	10	116585424	FAM160B1	Body;Body	S_Shelf	0
cg20143985	10	126920370	ZRANB1		S_Shelf	0.000189073
cg13521018	10	134429846	INPP5A	Body		2.11573
cg23570810	11	315102	IFITM1	Body	N_Shore	82.0774
cg20045320	11	319555	IFITM1		S_Shore	45.2846
cg04446326	11	14613845	PSMA1	Body		0
cg12083965	11	14995138	CALCA	TSS1500;TSS1500;TSS1500	Island	19.4048
cg21493660	11	45420442	CHST1			0.000867641
cg14822525	11	59579648	STX3	TSS1500	S_Shore	0
cg26250585	11	59950745	MS4A6A	TSS200;TSS200;TSS200		0
cg26241658	11	67790185	ALDH3B1	Body;Body;Body	S_Shore	21.6287
cg09784886	11	71293996	KRTAP5-11	TSS200		0
cg22797700	11	71493933	KRTAP5-11		N_Shelf	19.9745
cg27095222	11	88090861	GRM5-AS1			21.3934
cg08351489	11	92446329	FAT3	Body		53.9128
cg14106710	11	134513817	LOC283177			0.0253554
cg21448167	12	3333872	TSPAN9	Body;Body		71.3964
cg03846111	12	14547229	ATF7IP	5'UTR		0
cg20989409	12	15091896	ERP27	TSS1500		8.80884
cg15845673	12	25099560	BCAT1	Body	N_Shelf	0
cg27552493	12	62652662	FAM19A2		N_Shore	0
cg07677157	12	66050928	MSRB3			0.00316757
cg19871235	12	71552569	TSPAN8	TSS1500		0.0931538
cg00761125	12	96590115	ELK3	5'UTR	S_Shore	11.3553
cg15545247	12	123201372	HCAR3	1stExon;5'UTR		34.5901
cg13617280	12	129299462	SLC15A4	Body;TSS200		0.0360059
cg03636488	12	132551127	EP400	Body		0.00710218
cg10274208	13	41351044	SLC25A15			0.00211728
cg20489946	13	52731078	NEK3	5'UTR;5'UTR;5'UTR;Body	N_Shelf	16.4381
cg21408813	13	52736798	UTP14C		S_Shelf	38.2812
cg00246969	13	99159656	STK24	Body;Body		24.7125
cg25084760	13	100886412	PCCA	Body;Body		31.9151
cg14196263	13	110443740	COL4A2		S_Shelf	0
cg03676947	13	112573579	TEX29		N_Shelf	0
cg01620379	14	21052361	RNASE11	Body		53.7904
cg13020868	14	25522307	NOVA1		S_Shelf	63.9718
cg04285477	14	74194516	ELMSAN1	Body;Body		63.8438
cg10825315	14	81425912	TSHR	Body;Body;Body		59.6223
cg13525276	14	81426012	TSHR	Body;Body;Body		82.9594
cg18625627	14	81426015	TSHR	Body;Body;Body		78.4692
cg15827092	14	83600849	TSHR			47.5175
cg23625388	14	93076432	RIN3	Body		31.4698
cg04987734	14	103415873	CDC42BPB	Body		83.3377
cg09587957	15	40399101	BMF	TSS1500;TSS1500;TSS1500;5'UTR	N_Shore	0
cg12735498	15	44038390	CATSPER2P1	TSS200;Body	N_Shore	28.201
cg05061769	15	59700360	FAM81A			0
cg19670693	15	60337250	ANXA2			27.4144
cg11426726	15	63845726	USP3	Body		0
cg13615491	15	77712233	PEAK1	TSS1500	Island	0
cg03746015	16	11141000	CLEC16A	Body		56.5627
cg03071793	16	11682634	SNN	TSS1500	S_Shore	0
cg06437100	16	21767742	OTOA	Body;Body;Body	N_Shore	0
cg27118035	16	31891978	ZNF267	Body		79.2388
cg04102325	16	51147623	SALL1		Island	65.9355
cg07839457	16	57023022	FAM192A	TSS1500	N_Shore	2.51028
cg08368934	16	57701455	ADGRG3	TSS1500		50.213
cg06575692	16	68112968	DUS2	3'UTR		72.2949
cg09615688	16	80982506	CDYL2			0
cg01545556	16	88158998	BANP		S_Shelf	33.1298
cg04387347	16	88537187	ZFPM1	Body	Island	44.6919
cg15137213	17	585596	VPS53	Body;Body		0
cg00630007	17	851785	NXN	Body	S_Shore	78.4387
cg04856396	17	3589140	P2RX5	Body;Body		64.0374
cg21371645	17	7147256	CTDNEP1	3'UTR;3'UTR	S_Shore	42.6996
cg18370923	17	13927240	CDRT15P1	TSS1500		12.8662
cg23992493	17	21220479	MAP2K3		S_Shore	54.5772
cg24751155	17	26837363	FOXN1			0
cg20480274	17	27313125	SEZ6	Body;Body	Island	36.9907
cg17036458	17	28037399	SSH2	Body		0.0328424
cg07124642	17	39991813	NT5C3B	Body	N_Shore	0.00590418
cg14562086	17	48279265	COL1A1	TSS1500	S_Shore	0
cg11015353	17	73903405	FBF1		S_Shelf	36.2103
cg18181703	17	76354621	SOCS3	Body	N_Shore	83.3762
cg12377874	18	52495404	CCDC68	TSS1500	N_Shore	0
cg03404572	18	61329252	SERPINB3	TSS200		62.4251
cg06954658	18	76740093	SALL3	TSS200	Island	40.1761
cg02147126	19	827715	AZU1	TSS200		0.00540772
cg05032384	19	1138811	SBNO2	Body	N_Shelf	54.2049
cg00473597	19	6108131	RFX2	5'UTR;5'UTR	N_Shore	32.9343
cg26674132	19	9434637	ZNF559	TSS1500	N_Shore	12.3313
cg10604476	19	10403908	ICAM5	Body	Island	54.9306
cg21201109	19	11307090	KANK2	5'UTR	N_Shore	12.4851
cg22914338	19	14376960	ADGRL1		Island	0
cg03636183	19	17000585	F2RL3	Body	N_Shore	89.5334
cg00814328	19	22992509	ZNF492		S_Shore	15.9869
cg15094920	19	42299059	CEACAM3	TSS1500		23.3677
cg26470501	19	45252955	BCL3	Body	S_Shore	89.4661
cg27152890	19	45900241	PPP1R13L	Body;Body	Island	72.1328
cg22891070	19	46801642	HIF3A	Body;TSS200	S_Shore	24.8618
cg05825244	20	2730488	EBF4	Body	Island	41.4526
cg13693517	20	13616618	TASP1	5'UTR	N_Shelf	81.3473
cg06824795	20	31766130	BPIFA2	Body		0.0229771
cg14184078	20	54579814	CBLN4	5'UTR;1stExon	Island	59.0346
cg26033254	20	62680989	SOX18	TSS200	N_Shore	29.7527
cg05306070	21	45770298	TRPM2			55.6033
cg13315706	21	46341054	ITGB2	TSS200;5'UTR		81.6695
cg00742649	22	29190731	XBP1	3'UTR;3'UTR		0
cg22027471	22	32651776	RFPL3	TSS1500		50.7097
cg14425733	22	46451214	MIRLET7BHG	Body;TSS1500	S_Shore	55.1867
