# Supplementary material for: Blood DNA methylation sites predict death risk in a longitudinal study of 12,300 individuals
Source: Aging (Albany NY). 2020 Jul 22;12(14):14092–124. doi: 10.18632/aging.103408 (PMC7425458; doi:10.18632/aging.103408)
Supplement: Supplementary Table 10 [file aging-12-103408-s001..xlsx]

## Sheet: Sheet1
Table S10. Fixed effects meta-analysis results on incident coronary heart disease from the CHARGE Consortium
HR = hazard ratio; 95% CI = 95% confidence interval; p = p-value
Cohort	cg17086398				cg14866069				cg23666362				cg12619262				cg20045320				cg07677157				cg07839457				cg09615688				cg18424841
	HR	95% CI	p		HR	95% CI	p		HR	95% CI	p		HR	95% CI	p		HR	95% CI	p		HR	95% CI	p		HR	95% CI	p		HR	95% CI	p		HR	95% CI	p
ARIC	1.23609	(1.05; 1.46)	0.0108861		0.71431	(0.52; 0.98)	0.0399605		1.14727	(0.83; 1.6)	0.416418		1.10465	(0.93; 1.31)	0.254783		0.873779	(0.78; 0.98)	0.0265353		0.766931	(0.64; 0.91)	0.00269848		0.861381	(0.79; 0.94)	0.00173512		0.99727	(0.59; 1.67)	0.991659		1.06716	(0.92; 1.23)	0.37659
CHS_AA	0.635748	(0.34; 1.2)	0.159756		1.18313	(0.62; 2.27)	0.61131		1.84326	(0.73; 4.62)	0.193398		1.06606	(0.7; 1.62)	0.763712		0.867036	(0.61; 1.23)	0.433404		0.579686	(0.35; 0.96)	0.0332479		0.913634	(0.66; 1.25)	0.574276		NA	NA	NA		0.96535	(0.68; 1.36)	0.839112
CHS_EA	1.11202	(0.61; 2.03)	0.730221		1.05582	(0.47; 2.39)	0.895742		1.17938	(0.41; 3.35)	0.756644		0.821001	(0.55; 1.23)	0.337045		0.983094	(0.68; 1.4)	0.926164		1.07659	(0.68; 1.72)	0.754865		1.18095	(0.89; 1.57)	0.254815		NA	NA	NA		1.14586	(0.83; 1.6)	0.417238
EPICOR	1.4883	(0.9; 2.46)	0.117886		NA	NA	NA		0.78588	(0.4; 1.55)	0.489303		NA	NA	NA		0.922237	(0.69; 1.23)	0.584841		NA	NA	NA		1.07929	(0.81; 1.43)	0.595723		NA	NA	NA		1.04383	(0.77; 1.4)	0.78033
FHS	1.27572	(0.83; 1.97)	0.27		0.652986	(0.33; 1.31)	0.23		1.02665	(0.59; 1.79)	0.93		1.25419	(0.84; 1.86)	0.27		0.998879	(0.74; 1.35)	0.99		0.845225	(0.56; 1.27)	0.42		0.836709	(0.64; 1.09)	0.19		0.680313	(0.52; 0.89)	0.0045		0.925976	(0.68; 1.27)	0.63
InChianti	0.866417	(0.43; 1.75)	0.688519		0.85715	(0.29; 2.56)	0.781925		1.10236	(0.44; 2.8)	0.836975		0.685532	(0.4; 1.19)	0.17466		1.04429	(0.71; 1.52)	0.823408		1.18654	(0.68; 2.08)	0.548027		1.04257	(0.71; 1.52)	0.830367		0.945343	(0.45; 1.97)	0.88056		1.13256	(0.7; 1.82)	0.608119
KORA	1.30191	(0.62; 2.75)	0.488909		2.86097	(0.53; 15.33)	0.220971		2.72508	(0.88; 8.41)	0.082302		1.66387	(0.96; 2.86)	0.0670363		0.987525	(0.63; 1.55)	0.956727		1.29392	(0.81; 2.05)	0.279381		0.823398	(0.59; 1.16)	0.263079		NA	NA	NA		0.803901	(0.43; 1.52)	0.49985
NAS	1.36288	(0.93; 1.99)	0.11371		0.815702	(0.44; 1.49)	0.509988		0.468282	(0.24; 0.91)	0.0271598		1.15692	(0.84; 1.6)	0.385054		0.756957	(0.6; 0.95)	0.0181112		0.895211	(0.64; 1.25)	0.506838		0.825202	(0.69; 0.98)	0.0297693		NA	NA	NA		1.32722	(1.03; 1.72)	0.0301957
WHI-EMPC-AA	0.253154	(0.1; 0.61)	0.00243195		1.41356	(0.36; 5.47)	0.616202		NA	NA	NA		0.897923	(0.43; 1.88)	0.775747		0.909115	(0.55; 1.51)	0.713315		0.55988	(0.26; 1.21)	0.141714		1.16613	(0.76; 1.8)	0.491075		2.4824	(0.35; 17.46)	0.360434		1.09498	(0.59; 2.03)	0.775111
WHI-EMPC-EA	1.25308	(0.75; 2.12)	0.394891		0.391325	(0.19; 0.79)	0.00897221		NA	NA	NA		0.754835	(0.51; 1.13)	0.171543		0.842789	(0.63; 1.13)	0.254145		1.02171	(0.66; 1.58)	0.922949		0.909721	(0.7; 1.17)	0.464288		1.32723	(0.45; 3.86)	0.603834		0.824837	(0.57; 1.21)	0.319841
WHI-BAA23-AA	1.25813	(0.86; 1.84)	0.235627		0.859678	(0.54; 1.38)	0.52987		0.81426	(0.52; 1.28)	0.37212		0.845199	(0.61; 1.16)	0.303124		0.988445	(0.79; 1.25)	0.92185		1.04992	(0.73; 1.51)	0.790335		0.91139	(0.75; 1.11)	0.34675		0.880043	(0.44; 1.73)	0.712848		0.895788	(0.68; 1.19)	0.442036
WHI-BAA23-AA	0.915144	(0.68; 1.22)	0.549913		0.836983	(0.55; 1.28)	0.411435		0.936051	(0.66; 1.31)	0.703804		1.20891	(0.95; 1.54)	0.128467		0.944875	(0.79; 1.14)	0.546959		0.843432	(0.66; 1.07)	0.170241		0.828044	(0.71; 0.96)	0.0120221		1.20097	(0.68; 2.14)	0.533696		1.11485	(0.89; 1.4)	0.351853
Fixed-effect CHARGE meta-analysis	1.14789	(1.03; 1.28)	0.0119218		0.795877	(0.67; 0.95)	0.0111339		0.980824	(0.83; 1.16)	0.824147		1.05362	(0.95; 1.16)	0.29953		0.901944	(0.84; 0.97)	0.00396998		0.862343	(0.78; 0.95)	0.00434866		0.885565	(0.84; 0.94)	3.05666e-05		0.832119	(0.68; 1.01)	0.0657231		1.05244	(0.97; 1.14)	0.219085
