# Supplementary material for: Blood DNA methylation sites predict death risk in a longitudinal study of 12,300 individuals
Source: Aging (Albany NY). 2020 Jul 22;12(14):14092–124. doi: 10.18632/aging.103408 (PMC7425458; doi:10.18632/aging.103408)
Supplement: Supplementary Table 12 [file aging-12-103408-s003..xlsx]

## Sheet: Sheet1
Table S12. Standardized betas identifying the linear relationship between FDR-significant fully-adjusted CpGs and conventional risk factors
95% C I= 95% confidence interval
Conventional risk factors	cg17086398			cg14866069			cg23666362			cg12619262			cg20045320			cg07677157			cg07839457			cg09615688			cg18424841
	Standardized coefficient	95% CI		Standardized coefficient	95% CI		Standardized coefficient	95% CI		Standardized coefficient	95% CI		Standardized coefficient	95% CI		Standardized coefficient	95% CI		Standardized coefficient	95% CI		Standardized coefficient	95% CI		Standardized coefficient	95% CI
Age	-0.0630974	(-0.064; -0.063)		-0.024842	(-0.025; -0.024)		-0.075559	(-0.076; -0.075)		0.0384656	(0.038; 0.039)		-0.072461	(-0.073; -0.072)		-0.0542843	(-0.055; -0.054)		-0.206576	(-0.208; -0.205)		-0.0412861	(-0.042; -0.041)		0.0414502	(0.041; 0.042)
Cumulative smoking	0.0151839	(0.015; 0.015)		-0.0216052	(-0.022; -0.021)		0.0529315	(0.053; 0.053)		0.02644	(0.026; 0.027)		-0.108044	(-0.108; -0.108)		-0.0479282	(-0.048; -0.048)		-0.0108018	(-0.011; -0.01)		-0.0613132	(-0.061; -0.061)		0.0438956	(0.044; 0.044)
Body mass index	0.0512062	(0.05; 0.052)		-0.0118384	(-0.012; -0.011)		-0.0263006	(-0.027; -0.026)		0.0139706	(0.013; 0.015)		0.0154473	(0.014; 0.017)		-0.035354	(-0.036; -0.035)		0.0248983	(0.023; 0.026)		0.00614283	(0.006; 0.006)		0.0240186	(0.023; 0.025)
Physical activity	0.0033196	(0.003; 0.004)		0.00835038	(0.008; 0.009)		-0.0270187	(-0.027; -0.027)		-0.0204729	(-0.021; -0.02)		0.017375	(0.017; 0.018)		-0.0209879	(-0.021; -0.021)		0.00314192	(0.003; 0.004)		0.00566859	(0.006; 0.006)		-0.00554569	(-0.006; -0.005)
Education	-0.0248679	(-0.028; -0.021)		0.0035441	(0.001; 0.006)		0.0198059	(0.019; 0.021)		-0.00133251	(-0.006; 0.003)		0.00417669	(-0.002; 0.01)		0.00861142	(0.005; 0.013)		0.00770983	(0.001; 0.015)		-0.0131612	(-0.015; -0.011)		0.0139606	(0.009; 0.019)
Alcohol	-0.00489892	(-0.011; 0.001)		-0.0174869	(-0.021; -0.014)		0.0196813	(0.013; 0.026)		-0.0429912	(-0.05; -0.036)		-0.0515734	(-0.061; -0.043)		0.0133825	(0.007; 0.02)		-0.0201543	(-0.031; -0.009)		-0.0105875	(-0.012; -0.009)		0.0160586	(0.008; 0.024)
Cardiovascular disease	0.0207076	(0.002; 0.04)		-0.0297402	(-0.043; -0.016)		0.00916808	(0.003; 0.015)		0.00141356	(-0.023; 0.025)		-0.0460211	(-0.078; -0.015)		-0.0311052	(-0.053; -0.01)		0.00763515	(-0.03; 0.045)		0.0137615	(0.003; 0.024)		0.0149069	(-0.013; 0.042)
Type 2 diabetes	0.00433791	(-0.006; 0.015)		-9.35941e-05	(-0.007; 0.007)		-0.0205135	(-0.027; -0.014)		0.00368533	(-0.009; 0.017)		-0.0271944	(-0.044; -0.01)		-0.0122045	(-0.024; 0)		-0.00901601	(-0.029; 0.011)		-0.0126	(-0.017; -0.008)		0.026792	(0.012; 0.042)
Prior cancer	0.0172773	(-0.013; 0.047)		-0.00117001	(-0.022; 0.02)		0.0129774	(0.008; 0.018)		0.0173553	(-0.02; 0.055)		-0.0476446	(-0.097; 0.002)		-0.0188215	(-0.052; 0.014)		-0.00947779	(-0.069; 0.051)		-0.0103587	(-0.028; 0.007)		0.0252158	(-0.017; 0.067)
Hypertension	0.000411226	(-0.008; 0.008)		-0.00295367	(-0.008; 0.002)		-0.0260538	(-0.032; -0.02)		0.0147799	(0.005; 0.025)		-0.0519565	(-0.065; -0.039)		-0.00101078	(-0.01; 0.008)		-0.0301258	(-0.046; -0.015)		-0.00653156	(-0.01; -0.003)		0.0128037	(0.001; 0.025)
