# Supplementary material for: Blood DNA methylation sites predict death risk in a longitudinal study of 12,300 individuals
Source: Aging (Albany NY). 2020 Jul 22;12(14):14092–124. doi: 10.18632/aging.103408 (PMC7425458; doi:10.18632/aging.103408)
Supplement: Supplementary Table 17 [file aging-12-103408-s006..xlsx]

## Sheet: Sheet1
Table S17. KEGG pathways for FDR-significant CpGs in the basic model
p = p-value; FDR = false discovery rate
KEGG pathway	N	p	FDR
Metabolic pathways	1240	1.46379e-06	0.000471341
Pathways in cancer	394	0.00011183	0.0180046
Purine metabolism	171	0.000664757	0.0428104
HTLV-I infection	252	0.000624258	0.0428104
Chemical carcinogenesis	81	0.000525655	0.0428104
Pyrimidine metabolism	100	0.00105904	0.052725
Base excision repair	33	0.00169156	0.052725
cAMP signaling pathway	198	0.00180117	0.052725
Bacterial invasion of epithelial cells	76	0.00141948	0.052725
Amoebiasis	94	0.00157077	0.052725
Hepatocellular carcinoma	167	0.00122939	0.052725
TNF signaling pathway	108	0.00211986	0.056883
Neuroactive ligand-receptor interaction	273	0.00270462	0.0623685
Insulin resistance	107	0.00271167	0.0623685
Proteasome	45	0.00316769	0.0633327
Ferroptosis	40	0.00334365	0.0633327
Natural killer cell mediated cytotoxicity	116	0.00295128	0.0633327
Jak-STAT signaling pathway	147	0.00359196	0.0642562
Glutathione metabolism	54	0.00425386	0.0652258
Endocytosis	241	0.00401073	0.0652258
MicroRNAs in cancer	286	0.00414937	0.0652258
Valine, leucine and isoleucine degradation	48	0.00463835	0.0678885
Phagosome	147	0.00562206	0.0787089
Staphylococcus aureus infection	53	0.00624199	0.0837467
Valine, leucine and isoleucine biosynthesis	4	0.00922726	0.0928481
Drug metabolism - cytochrome P450	69	0.00755762	0.0928481
Biosynthesis of amino acids	70	0.00882228	0.0928481
MAPK signaling pathway	293	0.00920767	0.0928481
Phospholipase D signaling pathway	145	0.00951549	0.0928481
mTOR signaling pathway	150	0.00793733	0.0928481
Complement and coagulation cascades	79	0.00808606	0.0928481
Herpes simplex infection	173	0.00855269	0.0928481
Renin secretion	65	0.0100963	0.0950565
Breast cancer	151	0.0103322	0.0950565
Peroxisome	83	0.0106691	0.095429
Leishmaniasis	71	0.0120002	0.104434
p53 signaling pathway	68	0.0124573	0.105559
Calcium signaling pathway	180	0.0132747	0.106862
Adipocytokine signaling pathway	69	0.0131813	0.106862
Inositol phosphate metabolism	73	0.0137952	0.107948
Prolactin signaling pathway	70	0.0143419	0.107948
Salmonella infection	85	0.0147506	0.107948
Acute myeloid leukemia	66	0.0145876	0.107948
Antigen processing and presentation	69	0.0169644	0.119593
Rheumatoid arthritis	87	0.0170848	0.119593
Glioma	71	0.0192982	0.132213
Regulation of actin cytoskeleton	211	0.0197944	0.132788
Carbon metabolism	114	0.0229081	0.150539
Fc gamma R-mediated phagocytosis	90	0.0248652	0.160132
Primary bile acid biosynthesis	17	0.0257757	0.162741
EGFR tyrosine kinase inhibitor resistance	78	0.0263052	0.16289
Ras signaling pathway	234	0.0270766	0.164503
Phosphatidylinositol signaling system	99	0.0279736	0.166806
Fatty acid biosynthesis	13	0.0319077	0.177142
Oocyte meiosis	120	0.0309156	0.177142
Osteoclast differentiation	126	0.0316401	0.177142
Serotonergic synapse	112	0.0310936	0.177142
2-Oxocarboxylic acid metabolism	17	0.0337955	0.181369
Morphine addiction	91	0.0334516	0.181369
Estrogen signaling pathway	98	0.0355159	0.187478
Phenylalanine metabolism	17	0.0376869	0.192216
Sphingolipid signaling pathway	117	0.0388013	0.192216
Platelet activation	123	0.0382801	0.192216
Non-alcoholic fatty liver disease (NAFLD)	144	0.0376635	0.192216
Neurotrophin signaling pathway	119	0.0398482	0.194411
Ubiquitin mediated proteolysis	136	0.0415176	0.199532
Pantothenate and CoA biosynthesis	18	0.0427911	0.202629
Histidine metabolism	24	0.0475597	0.211059
Glyoxylate and dicarboxylate metabolism	28	0.0481012	0.211059
Protein processing in endoplasmic reticulum	164	0.0459045	0.211059
Glutamatergic synapse	114	0.0464782	0.211059
Insulin signaling pathway	138	0.0485043	0.211059
Relaxin signaling pathway	130	0.0481237	0.211059
Influenza A	159	0.0523792	0.224881
Nicotinate and nicotinamide metabolism	28	0.055368	0.234586
Alcoholism	175	0.0575153	0.237435
Tuberculosis	167	0.0569867	0.237435
SNARE interactions in vesicular transport	33	0.0596724	0.240182
Human papillomavirus infection	309	0.0593703	0.240182
PI3K-Akt signaling pathway	338	0.0617284	0.245389
Glycine, serine and threonine metabolism	39	0.0641205	0.245795
beta-Alanine metabolism	31	0.0636112	0.245795
Propanoate metabolism	32	0.0639022	0.245795
Tyrosine metabolism	35	0.0699748	0.261984
DNA replication	36	0.0697112	0.261984
Chemokine signaling pathway	185	0.0707846	0.261984
Kaposi's sarcoma-associated herpesvirus infection	176	0.0719295	0.263197
Mucin type O-glycan biosynthesis	30	0.0750505	0.266951
Circadian rhythm	30	0.0754426	0.266951
Gastric cancer	153	0.0754157	0.266951
Primary immunodeficiency	36	0.076461	0.267613
Fatty acid degradation	44	0.0787719	0.272737
Hippo signaling pathway	153	0.0797281	0.273111
Nucleotide excision repair	45	0.0843805	0.283026
Cytosolic DNA-sensing pathway	54	0.0841352	0.283026
Ether lipid metabolism	45	0.0877509	0.291297
Cysteine and methionine metabolism	44	0.0925388	0.304056
Malaria	48	0.0945371	0.307484
N-Glycan biosynthesis	48	0.0988952	0.318442
Olfactory transduction	396	0.0999205	0.318559
ABC transporters	44	0.10282	0.32459
Glycolysis / Gluconeogenesis	67	0.121108	0.345105
Fatty acid metabolism	48	0.11228	0.345105
Rap1 signaling pathway	210	0.11863	0.345105
Axon guidance	174	0.112951	0.345105
Focal adhesion	198	0.115273	0.345105
Endocrine and other factor-regulated calcium reabsorption	47	0.119731	0.345105
Pathogenic Escherichia coli infection	54	0.120219	0.345105
Legionellosis	55	0.120594	0.345105
Proteoglycans in cancer	203	0.114909	0.345105
Autoimmune thyroid disease	42	0.120009	0.345105
Pertussis	76	0.1284	0.362672
Notch signaling pathway	48	0.132	0.366711
Type I diabetes mellitus	41	0.132107	0.366711
Shigellosis	64	0.134615	0.370478
PPAR signaling pathway	72	0.137323	0.374728
Regulation of lipolysis in adipocytes	54	0.140693	0.377527
Type II diabetes mellitus	46	0.140448	0.377527
RNA degradation	77	0.145012	0.3859
Cardiac muscle contraction	74	0.146754	0.387335
Synaptic vesicle cycle	63	0.150826	0.394845
Platinum drug resistance	73	0.157303	0.401996
Fc epsilon RI signaling pathway	67	0.155631	0.401996
Taste transduction	82	0.156188	0.401996
IL-17 signaling pathway	91	0.159262	0.403799
B cell receptor signaling pathway	70	0.162565	0.408951
Long-term potentiation	67	0.165686	0.410392
Renal cell carcinoma	68	0.165311	0.410392
Viral myocarditis	56	0.16848	0.414128
Hematopoietic cell lineage	91	0.171084	0.414203
Basal cell carcinoma	63	0.170318	0.414203
Endometrial cancer	58	0.173661	0.417306
Thyroid hormone synthesis	74	0.17947	0.428069
Pancreatic cancer	75	0.184113	0.432733
Central carbon metabolism in cancer	65	0.183181	0.432733
Chronic myeloid leukemia	78	0.195142	0.452057
Arrhythmogenic right ventricular cardiomyopathy (ARVC)	72	0.194022	0.452057
Melanoma	76	0.198994	0.454441
Hypertrophic cardiomyopathy (HCM)	83	0.198392	0.454441
Pancreatic secretion	95	0.201871	0.457765
Ribosome	131	0.206241	0.464402
Glycerophospholipid metabolism	95	0.209491	0.468446
Progesterone-mediated oocyte maturation	95	0.211137	0.468869
GnRH signaling pathway	92	0.212946	0.469648
Systemic lupus erythematosus	125	0.216564	0.474379
ErbB signaling pathway	85	0.225889	0.475842
T cell receptor signaling pathway	102	0.224798	0.475842
GABAergic synapse	88	0.222791	0.475842
AGE-RAGE signaling pathway in diabetic complications	99	0.226099	0.475842
Small cell lung cancer	93	0.222101	0.475842
Dilated cardiomyopathy (DCM)	89	0.220849	0.475842
HIF-1 signaling pathway	99	0.230541	0.482039
Leukocyte transendothelial migration	110	0.232142	0.482256
Measles	124	0.237971	0.488067
Choline metabolism in cancer	98	0.237581	0.488067
Lysosome	123	0.240336	0.489486
Melanogenesis	101	0.243223	0.489486
Hepatitis C	121	0.242682	0.489486
Endocrine resistance	95	0.251333	0.498797
Circadian entrainment	96	0.252496	0.498797
Prostate cancer	97	0.249633	0.498797
Necroptosis	152	0.259231	0.508414
Vascular smooth muscle contraction	121	0.260523	0.508414
Fluid shear stress and atherosclerosis	139	0.271806	0.527239
FoxO signaling pathway	129	0.278204	0.536416
Thyroid hormone signaling pathway	116	0.281432	0.539411
Autophagy - animal	126	0.284979	0.542979
Cholinergic synapse	112	0.289985	0.549266
Apelin signaling pathway	136	0.299674	0.557775
Retrograde endocannabinoid signaling	140	0.299095	0.557775
Hepatitis B	135	0.298856	0.557775
Dopaminergic synapse	129	0.302363	0.559546
Adrenergic signaling in cardiomyocytes	143	0.317261	0.581088
Cell adhesion molecules (CAMs)	139	0.317613	0.581088
Signaling pathways regulating pluripotency of stem cells	138	0.325387	0.591948
Wnt signaling pathway	142	0.337047	0.609714
Tight junction	169	0.346365	0.619907
Oxytocin signaling pathway	152	0.346532	0.619907
Cellular senescence	157	0.350258	0.62311
cGMP-PKG signaling pathway	162	0.355041	0.628149
Cytokine-cytokine receptor interaction	254	0.359391	0.632371
Transcriptional misregulation in cancer	180	0.3915	0.685125
Epstein-Barr virus infection	197	0.397307	0.691529
Viral carcinogenesis	198	0.400954	0.694125
Citrate cycle (TCA cycle)	30	1	1
Pentose phosphate pathway	29	1	1
Pentose and glucuronate interconversions	33	1	1
Fructose and mannose metabolism	33	1	1
Galactose metabolism	29	1	1
Ascorbate and aldarate metabolism	27	1	1
Fatty acid elongation	25	1	1
Synthesis and degradation of ketone bodies	10	1	1
Steroid biosynthesis	20	1	1
Ubiquinone and other terpenoid-quinone biosynthesis	11	1	1
Steroid hormone biosynthesis	57	1	1
Oxidative phosphorylation	119	1	1
Arginine biosynthesis	20	1	1
Caffeine metabolism	5	1	1
Alanine, aspartate and glutamate metabolism	35	1	1
Lysine degradation	58	1	1
Arginine and proline metabolism	49	1	1
Tryptophan metabolism	39	1	1
Phenylalanine, tyrosine and tryptophan biosynthesis	5	1	1
Taurine and hypotaurine metabolism	11	1	1
Phosphonate and phosphinate metabolism	6	1	1
Selenocompound metabolism	16	1	1
D-Glutamine and D-glutamate metabolism	5	1	1
D-Arginine and D-ornithine metabolism	1	1	1
Starch and sucrose metabolism	34	1	1
Other glycan degradation	18	1	1
Other types of O-glycan biosynthesis	22	1	1
Mannose type O-glycan biosynthesis	22	1	1
Amino sugar and nucleotide sugar metabolism	48	1	1
Neomycin, kanamycin and gentamicin biosynthesis	5	1	1
Glycosaminoglycan degradation	19	1	1
Glycosaminoglycan biosynthesis - chondroitin sulfate / dermatan sulfate	20	1	1
Glycosaminoglycan biosynthesis - keratan sulfate	14	1	1
Glycosaminoglycan biosynthesis - heparan sulfate / heparin	24	1	1
Glycerolipid metabolism	60	1	1
Glycosylphosphatidylinositol (GPI)-anchor biosynthesis	25	1	1
Arachidonic acid metabolism	62	1	1
Linoleic acid metabolism	29	1	1
alpha-Linolenic acid metabolism	25	1	1
Sphingolipid metabolism	47	1	1
Glycosphingolipid biosynthesis - lacto and neolacto series	27	1	1
Glycosphingolipid biosynthesis - globo and isoglobo series	14	1	1
Glycosphingolipid biosynthesis - ganglio series	15	1	1
Pyruvate metabolism	39	1	1
Butanoate metabolism	27	1	1
One carbon pool by folate	19	1	1
Thiamine metabolism	15	1	1
Riboflavin metabolism	8	1	1
Vitamin B6 metabolism	6	1	1
Biotin metabolism	3	1	1
Folate biosynthesis	26	1	1
Porphyrin and chlorophyll metabolism	42	1	1
Nitrogen metabolism	17	1	1
Aminoacyl-tRNA biosynthesis	44	1	1
Drug metabolism - other enzymes	46	1	1
Biosynthesis of unsaturated fatty acids	23	1	1
Antifolate resistance	31	1	1
Ribosome biogenesis in eukaryotes	77	1	1
RNA transport	166	1	1
mRNA surveillance pathway	89	1	1
RNA polymerase	31	1	1
Basal transcription factors	44	1	1
Spliceosome	130	1	1
Protein export	23	1	1
Mismatch repair	23	1	1
Homologous recombination	41	1	1
Non-homologous end-joining	13	1	1
Fanconi anemia pathway	52	1	1
NF-kappa B signaling pathway	94	1	1
Cell cycle	124	1	1
Sulfur relay system	8	1	1
Autophagy - other	31	1	1
Mitophagy - animal	63	1	1
AMPK signaling pathway	119	1	1
Apoptosis	137	1	1
Longevity regulating pathway	89	1	1
Longevity regulating pathway - multiple species	62	1	1
Apoptosis - multiple species	32	1	1
Hedgehog signaling pathway	46	1	1
TGF-beta signaling pathway	83	1	1
VEGF signaling pathway	59	1	1
Hippo signaling pathway - multiple species	28	1	1
ECM-receptor interaction	82	1	1
Adherens junction	72	1	1
Gap junction	87	1	1
Renin-angiotensin system	23	1	1
Toll-like receptor signaling pathway	95	1	1
NOD-like receptor signaling pathway	158	1	1
RIG-I-like receptor signaling pathway	59	1	1
Th1 and Th2 cell differentiation	90	1	1
Th17 cell differentiation	105	1	1
Intestinal immune network for IgA production	45	1	1
Long-term depression	60	1	1
Phototransduction	28	1	1
Inflammatory mediator regulation of TRP channels	97	1	1
Insulin secretion	85	1	1
Ovarian steroidogenesis	50	1	1
Glucagon signaling pathway	101	1	1
Aldosterone synthesis and secretion	82	1	1
Maturity onset diabetes of the young	26	1	1
Aldosterone-regulated sodium reabsorption	37	1	1
Vasopressin-regulated water reabsorption	44	1	1
Proximal tubule bicarbonate reclamation	23	1	1
Collecting duct acid secretion	27	1	1
Salivary secretion	90	1	1
Gastric acid secretion	75	1	1
Carbohydrate digestion and absorption	42	1	1
Protein digestion and absorption	89	1	1
Fat digestion and absorption	41	1	1
Bile secretion	70	1	1
Vitamin digestion and absorption	24	1	1
Mineral absorption	50	1	1
Alzheimer's disease	164	1	1
Parkinson's disease	127	1	1
Amyotrophic lateral sclerosis (ALS)	51	1	1
Huntington's disease	185	1	1
Prion diseases	35	1	1
Cocaine addiction	49	1	1
Amphetamine addiction	68	1	1
Nicotine addiction	40	1	1
Vibrio cholerae infection	50	1	1
Epithelial cell signaling in Helicobacter pylori infection	68	1	1
Chagas disease (American trypanosomiasis)	101	1	1
African trypanosomiasis	34	1	1
Toxoplasmosis	111	1	1
Colorectal cancer	72	1	1
Thyroid cancer	37	1	1
Bladder cancer	41	1	1
Non-small cell lung cancer	66	1	1
Asthma	28	1	1
Inflammatory bowel disease (IBD)	63	1	1
Allograft rejection	35	1	1
Graft-versus-host disease	37	1	1
